# Supplementary material for: Comprehensive characterization of genomic and radiologic features reveals distinct driver patterns of RTK/RAS pathway in ground‐glass opacity pulmonary nodules
Source: PubMed Central journal article supplement — Int J Cancer. 2022 Aug 27;151(11):2020–30. doi: 10.1002/ijc.34238 (PMC9805018; doi:10.1002/ijc.34238), 2022-08-27
Supplement: IJC-151-2020-s001.pdf [file IJC-151-2020-s001.pdf]

**Title:** Comprehensive characterization of genomic and radiologic features reveals distinct driver patterns of RTK/RAS pathway in ground-glass opacity pulmonary nodules

**Authors:** Fenglei Yu, Muyun Peng, Jing Bai, Xiuli Zhu, Bingyu Zhang, Jingqun Tang, Wenliang Liu, Chen Che, Xiang Wang, Mingjiu Chen, Sichuang Tan, Yi Sun, Qingchun Liang, Jina Li, Yan Hu, Aihui Liao, Huali Hu, Yu He, Xiao Xiao, Bin Wang, Guanlan Xing, Yaping Xu, Rongrong Chen, Xuefeng Xia, Xiaofeng Chen

**Contents of the supplementary material**

|                         |                                                                                                                                                                         |
|-------------------------|-------------------------------------------------------------------------------------------------------------------------------------------------------------------------|
| Supplementary Table S1  | Clinical characteristics of 262 patients and 334 pulmonary nodules.                                                                                                     |
| Supplementary Table S2. | A target gene list of the 1021-gene panel.                                                                                                                              |
| Supplementary Table S3. | Quality control of the sequencing data.                                                                                                                                 |
| Supplementary Figure S1 | Internodal heterogeneity comparison in the same patients presenting as GGO.                                                                                             |
| Supplementary Figure S2 | Radar plots showing the standard radiologic features including CT size, CT mass, CT volume and CT value in each group of GGO nodules defined by different driver genes. |
| Supplementary Figure S3 | The association of co-mutation with clinicopathologic and radiologic features in GGO nodules                                                                            |

Supplementary Table S1. Clinical characteristics of 262 patients and 334 pulmonary nodules.

| Characteristics                           | N = 262/334 (%) |
|-------------------------------------------|-----------------|
| <b>Age at diagnosis</b>                   |                 |
| Median (range)                            | 54 (27-79)      |
| <b>Gender</b>                             |                 |
| Female                                    | 185 (70.6%)     |
| Male                                      | 77 (29.4%)      |
| <b>Smoking</b>                            |                 |
| No                                        | 217 (82.8%)     |
| Yes/Ever                                  | 30 (11.5%)      |
| Unknown                                   | 15 (5.7%)       |
| <b>Nodule type</b>                        |                 |
| Pure ground-glass nodule (pure GGO)       | 79 (23.7%)      |
| Part-solid nodule (mixed GGO)             | 255 (76.3%)     |
| <b>Nodule size</b>                        |                 |
| ≤ 10.0 mm                                 | 121 (36.2%)     |
| > 10.0, ≤ 20.0 mm                         | 158 (47.3%)     |
| > 20.0, ≤ 30.0 mm                         | 55 (16.5%)      |
| <b>Mean CT attenuation</b>                |                 |
| ≤ -500 HU                                 | 192 (57.5%)     |
| > -500 HU                                 | 142 (42.5%)     |
| <b>CT volume</b>                          |                 |
| ≤ 400 mm <sup>3</sup>                     | 105 (31.4%)     |
| > 400 mm <sup>3</sup>                     | 229 (68.6%)     |
| <b>Nodule mass</b>                        |                 |
| ≤ 200 mg                                  | 151 (45.2%)     |
| > 200 mg                                  | 183(54.8%)      |
| <b>Consolidation-to-tumor ratio (CTR)</b> |                 |
| = 0                                       | 79 (23.7%)      |
| < 0.5                                     | 158 (47.3%)     |
| > 0.5                                     | 97 (29.0%)      |
| <b>Histologic type</b>                    |                 |
| Atypical adenomatous hyperplasia (AAH)    | 5 (1.5%)        |
| Adenocarcinoma <i>in situ</i> (AIS)       | 33 (9.9%)       |
| Minimally invasive adenocarcinoma (MIA)   | 80 (24.0%)      |
| Invasive adenocarcinoma                   | 216 (64.7%)     |
| <b>Tumor stage</b>                        |                 |
| AAH+AIS                                   | 38 (11.4%)      |
| IA1                                       | 168 (50.3%)     |
| IA2                                       | 77 (23.1%)      |
| IA3                                       | 11 (3.3%)       |
| IB                                        | 40 (12.0%)      |

The AJCC (American Joint Committee on Cancer) 8th edition lung cancer staging system was used to classify tumor stage.

**Supplementary Table S2. A target gene list of the 1021-gene panel.**

| <b>Gene name</b> | <b>Coverage of capture probes</b> |
|------------------|-----------------------------------|
| ABL1             | Whole CDS                         |
| ABL2             | Whole CDS                         |
| ACVR1B           | Whole CDS                         |
| AKT1             | Whole CDS                         |
| AKT2             | Whole CDS                         |
| AKT3             | Whole CDS                         |
| ALK              | Whole CDS,non-coding region       |
| APC              | Whole CDS                         |
| AR               | Whole CDS                         |
| ARAF             | Whole CDS                         |
| ARID1A           | Whole CDS                         |
| ARID1B           | Whole CDS                         |
| ARID2            | Whole CDS                         |
| ASXL1            | Whole CDS                         |
| ATM              | Whole CDS                         |
| ATR              | Whole CDS                         |
| ATRX             | Whole CDS                         |
| AURKA            | Whole CDS                         |
| AURKB            | Whole CDS                         |
| AXIN1            | Whole CDS                         |
| AXIN2            | Whole CDS                         |
| AXL              | Whole CDS                         |
| B2M              | Whole CDS                         |
| BAP1             | Whole CDS                         |
| BARD1            | Whole CDS                         |
| BCL2             | Whole CDS                         |
| BCL2L1           | Whole CDS                         |
| BCOR             | Whole CDS                         |
| BLM              | Whole CDS                         |
| BMPR1A           | Whole CDS                         |
| BRAF             | Whole CDS,non-coding region       |
| BRCA1            | Whole CDS,non-coding region       |
| BRCA2            | Whole CDS                         |
| BRD4             | Whole CDS,non-coding region       |
| BRIP1            | Whole CDS                         |
| BTK              | Whole CDS                         |
| C11orf30         | Whole CDS                         |
| CASP8            | Whole CDS                         |
| CBFB             | Whole CDS                         |
| CBL              | Whole CDS                         |
| CCND1            | Whole CDS                         |
| CCND2            | Whole CDS                         |
| CCND3            | Whole CDS                         |
| CCNE1            | Whole CDS                         |
| CD274            | Whole CDS                         |
| CDC73            | Whole CDS                         |
| CDH1             | Whole CDS                         |
| CDK12            | Whole CDS                         |
| CDK4             | Whole CDS                         |
| CDK6             | Whole CDS                         |
| CDK8             | Whole CDS                         |
| CDKN1A           | Whole CDS                         |

|         |                             |
|---------|-----------------------------|
| CDKN1B  | Whole CDS                   |
| CDKN2A  | Whole CDS                   |
| CDKN2B  | Whole CDS                   |
| CDKN2C  | Whole CDS                   |
| CEBPA   | Whole CDS                   |
| CHEK1   | Whole CDS                   |
| CHEK2   | Whole CDS                   |
| CIC     | Whole CDS                   |
| CREBBP  | Whole CDS                   |
| CRKL    | Whole CDS                   |
| CSF1R   | Whole CDS                   |
| CTCF    | Whole CDS                   |
| CTNNA1  | Whole CDS                   |
| CTNNB1  | Whole CDS                   |
| CUL3    | Whole CDS                   |
| CYLD    | Whole CDS                   |
| DAXX    | Whole CDS                   |
| DDR1    | Whole CDS                   |
| DDR2    | Whole CDS                   |
| DICER1  | Whole CDS                   |
| DNMT3A  | Whole CDS                   |
| EGFR    | Whole CDS,non-coding region |
| ELAC2   | Whole CDS                   |
| EME2    | Whole CDS                   |
| EP300   | Whole CDS                   |
| EPAS1   | Whole CDS                   |
| EPCAM   | Whole CDS                   |
| EPHA2   | Whole CDS                   |
| EPHA3   | Whole CDS                   |
| EPHA5   | Whole CDS                   |
| EPHB2   | Whole CDS                   |
| EPHB6   | Whole CDS                   |
| ERBB2   | Whole CDS                   |
| ERBB3   | Whole CDS                   |
| ERBB4   | Whole CDS                   |
| ERCC1   | Whole CDS                   |
| ERCC3   | Whole CDS                   |
| ERG     | Whole CDS,non-coding region |
| ERRF1   | Whole CDS                   |
| ESR1    | Whole CDS                   |
| EXT1    | Whole CDS                   |
| EXT2    | Whole CDS                   |
| EZH2    | Whole CDS                   |
| FAM123B | Whole CDS                   |
| FAM175A | Whole CDS                   |
| FANCA   | Whole CDS                   |
| FANCC   | Whole CDS                   |
| FANCD2  | Whole CDS                   |
| FANCG   | Whole CDS                   |
| FANCM   | Whole CDS                   |
| FAS     | Whole CDS                   |
| FAT1    | Whole CDS                   |
| FAT2    | Whole CDS                   |
| FBXW7   | Whole CDS                   |

|          |                             |
|----------|-----------------------------|
| FCGR2A   | Whole CDS                   |
| FCGR3A   | Whole CDS                   |
| FGFR1    | Whole CDS,non-coding region |
| FGFR2    | Whole CDS,non-coding region |
| FGFR3    | Whole CDS,non-coding region |
| FGFR4    | Whole CDS                   |
| FH       | Whole CDS                   |
| FLCN     | Whole CDS                   |
| FLT1     | Whole CDS                   |
| FLT3     | Whole CDS                   |
| FLT4     | Whole CDS                   |
| FOXA1    | Whole CDS                   |
| FOXL2    | Whole CDS                   |
| FOXP1    | Whole CDS                   |
| FUBP1    | Whole CDS                   |
| GAB2     | Whole CDS                   |
| GALNT12  | Whole CDS                   |
| GATA3    | Whole CDS                   |
| GNA11    | Whole CDS                   |
| GNAQ     | Whole CDS                   |
| GNAS     | Whole CDS                   |
| GRIN2A   | Whole CDS                   |
| HDAC1    | Whole CDS                   |
| HDAC4    | Whole CDS                   |
| HGF      | Whole CDS                   |
| HNF1A    | Whole CDS                   |
| HOXB13   | Whole CDS                   |
| HRAS     | Whole CDS                   |
| HSP90AA1 | Whole CDS                   |
| IDH1     | Whole CDS                   |
| IDH2     | Whole CDS                   |
| IFNG     | Whole CDS                   |
| IFNGR1   | Whole CDS                   |
| IGF1R    | Whole CDS                   |
| IL7R     | Whole CDS                   |
| INPP4B   | Whole CDS                   |
| IRF2     | Whole CDS                   |
| IRS2     | Whole CDS                   |
| JAK1     | Whole CDS                   |
| JAK2     | Whole CDS                   |
| JAK3     | Whole CDS                   |
| KDM5A    | Whole CDS                   |
| KDM5C    | Whole CDS                   |
| KDM6A    | Whole CDS                   |
| KDR      | Whole CDS                   |
| KEAP1    | Whole CDS                   |
| KIT      | Whole CDS,non-coding region |
| KRAS     | Whole CDS                   |
| LRP1B    | Whole CDS                   |
| MAP2K1   | Whole CDS                   |
| MAP2K2   | Whole CDS                   |
| MAP2K4   | Whole CDS                   |
| MAP3K1   | Whole CDS                   |
| MAPK1    | Whole CDS                   |

|          |                             |
|----------|-----------------------------|
| MAX      | Whole CDS                   |
| MCL1     | Whole CDS                   |
| MDM2     | Whole CDS                   |
| MDM4     | Whole CDS                   |
| MED12    | Whole CDS                   |
| MEN1     | Whole CDS                   |
| MET      | Whole CDS,non-coding region |
| MITF     | Whole CDS                   |
| MLH1     | Whole CDS                   |
| MLH3     | Whole CDS                   |
| MLL      | Whole CDS                   |
| MLL2     | Whole CDS                   |
| MLL3     | Whole CDS                   |
| MPL      | Whole CDS                   |
| MRE11A   | Whole CDS                   |
| MS4A1    | Whole CDS                   |
| MSH2     | Whole CDS,non-coding region |
| MSH3     | Whole CDS                   |
| MSH6     | Whole CDS                   |
| MTOR     | Whole CDS                   |
| MUTYH    | Whole CDS                   |
| MYC      | Whole CDS,non-coding region |
| MYCL1    | Whole CDS,non-coding region |
| MYCN     | Whole CDS                   |
| MYD88    | Whole CDS                   |
| NBN      | Whole CDS                   |
| NCOR1    | Whole CDS                   |
| NDUFA13  | Whole CDS                   |
| NF1      | Whole CDS                   |
| NF2      | Whole CDS                   |
| NOTCH1   | Whole CDS                   |
| NOTCH2   | Whole CDS,non-coding region |
| NOTCH3   | Whole CDS                   |
| NOTCH4   | Whole CDS                   |
| NPM1     | Whole CDS                   |
| NRAS     | Whole CDS                   |
| NSD1     | Whole CDS                   |
| NTHL1    | Whole CDS                   |
| NTRK1    | Whole CDS,non-coding region |
| NTRK3    | Whole CDS,non-coding region |
| PALB2    | Whole CDS                   |
| PAX5     | Whole CDS                   |
| PBRM1    | Whole CDS                   |
| PCK1     | Whole CDS                   |
| PDCD1LG2 | Whole CDS                   |
| PDGFRA   | Whole CDS,non-coding region |
| PDGFRB   | Whole CDS                   |
| PDK1     | Whole CDS                   |
| PHF6     | Whole CDS                   |
| PIK3CA   | Whole CDS                   |
| PIK3CB   | Whole CDS                   |
| PIK3CG   | Whole CDS                   |
| PIK3R1   | Whole CDS                   |
| PIK3R2   | Whole CDS                   |

|          |                             |
|----------|-----------------------------|
| PMS1     | Whole CDS                   |
| PMS2     | Whole CDS,non-coding region |
| POLD1    | Whole CDS                   |
| POLE     | Whole CDS                   |
| POT1     | Whole CDS                   |
| PPM1D    | Whole CDS                   |
| PRKAR1A  | Whole CDS                   |
| PTCH1    | Whole CDS                   |
| PTCH2    | Whole CDS                   |
| PTEN     | Whole CDS                   |
| PTPN11   | Whole CDS                   |
| RAD50    | Whole CDS                   |
| RAD51    | Whole CDS                   |
| RAD51B   | Whole CDS                   |
| RAD51C   | Whole CDS                   |
| RAD51D   | Whole CDS                   |
| RAF1     | Whole CDS,non-coding region |
| RARA     | Whole CDS                   |
| RB1      | Whole CDS                   |
| RBM10    | Whole CDS                   |
| RET      | Whole CDS,non-coding region |
| RHEB     | Whole CDS                   |
| RHOA     | Whole CDS                   |
| RICTOR   | Whole CDS                   |
| RINT1    | Whole CDS                   |
| RNASEL   | Whole CDS                   |
| RNF43    | Whole CDS                   |
| ROS1     | Whole CDS,non-coding region |
| RPS6KB1  | Whole CDS                   |
| RUNX1    | Whole CDS                   |
| SDHA     | Whole CDS                   |
| SDHAF2   | Whole CDS                   |
| SDHB     | Whole CDS                   |
| SDHC     | Whole CDS                   |
| SDHD     | Whole CDS                   |
| SERPINB3 | Whole CDS                   |
| SERPINB4 | Whole CDS                   |
| SETD2    | Whole CDS                   |
| SLX4     | Whole CDS                   |
| SMAD2    | Whole CDS                   |
| SMAD4    | Whole CDS                   |
| SMARCA4  | Whole CDS                   |
| SMARCB1  | Whole CDS                   |
| SMARCE1  | Whole CDS                   |
| SMO      | Whole CDS                   |
| SOX2     | Whole CDS                   |
| SOX9     | Whole CDS                   |
| SRC      | Whole CDS                   |
| STAG2    | Whole CDS                   |
| STAT3    | Whole CDS                   |
| STK11    | Whole CDS                   |
| SUFU     | Whole CDS                   |
| SYK      | Whole CDS                   |
| TBX3     | Whole CDS                   |

|          |                             |
|----------|-----------------------------|
| TCF7L2   | Whole CDS                   |
| TET2     | Whole CDS                   |
| TGFBR2   | Whole CDS                   |
| TMEM127  | Whole CDS                   |
| TMPRSS2  | Whole CDS,non-coding region |
| TNFAIP3  | Whole CDS                   |
| TOP1     | Whole CDS                   |
| TOP2A    | Whole CDS                   |
| TP53     | Whole CDS                   |
| TP73     | Whole CDS                   |
| TSC1     | Whole CDS                   |
| TSC2     | Whole CDS                   |
| VEGFA    | Whole CDS                   |
| VHL      | Whole CDS                   |
| WT1      | Whole CDS                   |
| XPO1     | Whole CDS                   |
| XRCC2    | Whole CDS                   |
| XRCC3    | Whole CDS                   |
| ZFHX3    | Whole CDS                   |
| ZMAT3    | Whole CDS                   |
| ABCA13   | selected CDSs               |
| ABCB1    | selected CDSs               |
| ABCC1    | selected CDSs               |
| ABCC11   | selected CDSs               |
| ABCC2    | selected CDSs               |
| ABCG2    | selected CDSs               |
| ACACA    | selected CDSs               |
| ACIN1    | selected CDSs               |
| ACTB     | selected CDSs               |
| ACTG1    | selected CDSs               |
| ACTG2    | selected CDSs               |
| ACVR2A   | selected CDSs               |
| ACVRL1   | selected CDSs               |
| ADAM29   | selected CDSs               |
| ADAMTS5  | selected CDSs               |
| ADCY1    | selected CDSs               |
| AFF1     | selected CDSs               |
| AFF2     | selected CDSs               |
| AFF3     | selected CDSs               |
| AFF4     | selected CDSs               |
| AHNAK    | selected CDSs               |
| AKAP9    | selected CDSs               |
| ALB      | selected CDSs               |
| AMOT     | selected CDSs               |
| ANGPT1   | selected CDSs               |
| ANK3     | selected CDSs               |
| ANKRD27  | selected CDSs               |
| ANKRD30A | selected CDSs               |
| ANKRD30B | selected CDSs               |
| ANKRD36B | selected CDSs               |
| APEX1    | selected CDSs               |
| APOBEC3B | selected CDSs               |
| ARAP3    | selected CDSs               |
| ARFGEF1  | selected CDSs               |



|          |                                 |
|----------|---------------------------------|
| ARFGEF2  | selected CDSs                   |
| ARHGAP26 | selected CDSs                   |
| ARHGAP29 | selected CDSs                   |
| ARHGAP35 | selected CDSs                   |
| ARID4B   | selected CDSs                   |
| ARNT     | selected CDSs                   |
| ASCL4    | selected CDSs                   |
| ASH1L    | selected CDSs                   |
| ASMTL    | selected CDSs                   |
| ASPM     | selected CDSs                   |
| ASTN1    | selected CDSs                   |
| ASXL2    | selected CDSs                   |
| ATIC     | selected CDSs                   |
| ATP11B   | selected CDSs                   |
| ATP12A   | selected CDSs                   |
| ATP1A1   | selected CDSs                   |
| ATP2B3   | selected CDSs                   |
| BAZ2B    | selected CDSs                   |
| BBS9     | selected CDSs                   |
| BCAS1    | selected CDSs                   |
| BCL11A   | selected CDSs                   |
| BCL11B   | selected CDSs                   |
| BCL2A1   | selected CDSs                   |
| BCL2L11  | selected CDSs,non-coding region |
| BCL3     | selected CDSs                   |
| BCL9     | selected CDSs                   |
| BCLAF1   | selected CDSs                   |
| BCORL1   | selected CDSs                   |
| BCR      | selected CDSs                   |
| BIRC2    | selected CDSs                   |
| BIRC3    | selected CDSs                   |
| BMPR2    | selected CDSs                   |
| BNC2     | selected CDSs                   |
| BPTF     | selected CDSs                   |
| BRD2     | selected CDSs                   |
| BRD3     | selected CDSs                   |
| BRSK1    | selected CDSs                   |
| BRWD1    | selected CDSs                   |
| BTLA     | selected CDSs                   |
| BUB1     | selected CDSs                   |
| C15orf23 | selected CDSs                   |
| C15orf55 | selected CDSs                   |
| C1QA     | selected CDSs                   |
| C1S      | selected CDSs                   |
| C3orf70  | selected CDSs                   |
| C7orf53  | selected CDSs                   |
| C8orf34  | selected CDSs                   |
| CACNA1D  | selected CDSs                   |
| CACNA1E  | selected CDSs                   |
| CADM2    | selected CDSs                   |
| CAMTA1   | selected CDSs                   |
| CAPN7    | selected CDSs                   |
| CARD11   | selected CDSs                   |
| CASP1    | selected CDSs                   |

|         |               |
|---------|---------------|
| CASQ2   | selected CDSs |
| CBLB    | selected CDSs |
| CBR1    | selected CDSs |
| CBR3    | selected CDSs |
| CCDC168 | selected CDSs |
| CCNA1   | selected CDSs |
| CCNB3   | selected CDSs |
| CCT3    | selected CDSs |
| CCT5    | selected CDSs |
| CCT6B   | selected CDSs |
| CD22    | selected CDSs |
| CD33    | selected CDSs |
| CD5L    | selected CDSs |
| CDA     | selected CDSs |
| CDH11   | selected CDSs |
| CDH18   | selected CDSs |
| CDH23   | selected CDSs |
| CDK13   | selected CDSs |
| CHD1    | selected CDSs |
| CHD1L   | selected CDSs |
| CHD3    | selected CDSs |
| CHD4    | selected CDSs |
| CHD6    | selected CDSs |
| CHD8    | selected CDSs |
| CHD9    | selected CDSs |
| CHFR    | selected CDSs |
| CHI3L1  | selected CDSs |
| CHN1    | selected CDSs |
| CIITA   | selected CDSs |
| CKS1B   | selected CDSs |
| CLCC1   | selected CDSs |
| CLDN18  | selected CDSs |
| CLP1    | selected CDSs |
| CLSPN   | selected CDSs |
| CLTC    | selected CDSs |
| CNOT3   | selected CDSs |
| CNOT4   | selected CDSs |
| CNTN1   | selected CDSs |
| CNTN5   | selected CDSs |
| CNTNAP1 | selected CDSs |
| CNTNAP5 | selected CDSs |
| COL1A1  | selected CDSs |
| COL2A1  | selected CDSs |
| COL5A1  | selected CDSs |
| COL5A2  | selected CDSs |
| COL5A3  | selected CDSs |
| COPS2   | selected CDSs |
| CPS1    | selected CDSs |
| CREB3L1 | selected CDSs |
| CRIPAK  | selected CDSs |
| CRLF2   | selected CDSs |
| CRNKL1  | selected CDSs |
| CRTC1   | selected CDSs |
| CRYBG3  | selected CDSs |

|         |               |
|---------|---------------|
| CSF1    | selected CDSs |
| CSF3R   | selected CDSs |
| CSMD1   | selected CDSs |
| CSMD3   | selected CDSs |
| CSNK1A1 | selected CDSs |
| CSNK1G3 | selected CDSs |
| CSNK2A1 | selected CDSs |
| CTLA4   | selected CDSs |
| CTNNA2  | selected CDSs |
| CTNND1  | selected CDSs |
| CUX1    | selected CDSs |
| CYBA    | selected CDSs |
| CYP19A1 | selected CDSs |
| CYP1A1  | selected CDSs |
| CYP1B1  | selected CDSs |
| CYP2A13 | selected CDSs |
| CYP2C19 | selected CDSs |
| CYP2C8  | selected CDSs |
| CYP2D6  | selected CDSs |
| CYP3A4  | selected CDSs |
| CYP3A5  | selected CDSs |
| DCC     | selected CDSs |
| DDX3X   | selected CDSs |
| DDX5    | selected CDSs |
| DEK     | selected CDSs |
| DHX35   | selected CDSs |
| DHX9    | selected CDSs |
| DIAPH1  | selected CDSs |
| DIS3L2  | selected CDSs |
| DLC1    | selected CDSs |
| DMD     | selected CDSs |
| DNAH6   | selected CDSs |
| DNAJC11 | selected CDSs |
| DNM2    | selected CDSs |
| DNMT1   | selected CDSs |
| DOCK2   | selected CDSs |
| DOCK7   | selected CDSs |
| DOT1L   | selected CDSs |
| DPYD    | selected CDSs |
| DRGX    | selected CDSs |
| DTX1    | selected CDSs |
| DUSP22  | selected CDSs |
| DYSF    | selected CDSs |
| EBF1    | selected CDSs |
| ECT2L   | selected CDSs |
| EEF1A1  | selected CDSs |
| EGR3    | selected CDSs |
| EIF2AK3 | selected CDSs |
| EIF2C3  | selected CDSs |
| EIF3A   | selected CDSs |
| EIF4G3  | selected CDSs |
| ELF1    | selected CDSs |
| ELF3    | selected CDSs |
| ELF4    | selected CDSs |

|         |                                 |
|---------|---------------------------------|
| ELL     | selected CDSs                   |
| ELMO1   | selected CDSs                   |
| ELN     | selected CDSs                   |
| EMID2   | selected CDSs                   |
| EPC1    | selected CDSs                   |
| EPHA1   | selected CDSs                   |
| EPHA4   | selected CDSs                   |
| EPHA7   | selected CDSs                   |
| EPHB1   | selected CDSs                   |
| EPHB4   | selected CDSs                   |
| EPOR    | selected CDSs                   |
| EPPK1   | selected CDSs                   |
| EPS15   | selected CDSs                   |
| ERBB2IP | selected CDSs                   |
| ERCC2   | selected CDSs                   |
| ESR2    | selected CDSs                   |
| ETS1    | selected CDSs                   |
| ETV1    | selected CDSs                   |
| ETV5    | selected CDSs                   |
| ETV6    | selected CDSs,non-coding region |
| EWSR1   | selected CDSs                   |
| EZR     | selected CDSs,non-coding region |
| F8      | selected CDSs                   |
| FAM131B | selected CDSs                   |
| FAM135B | selected CDSs                   |
| FAM157B | selected CDSs                   |
| FAM22A  | selected CDSs                   |
| FAM46C  | selected CDSs                   |
| FAM5C   | selected CDSs                   |
| FAP     | selected CDSs                   |
| FASLG   | selected CDSs                   |
| FAT3    | selected CDSs                   |
| FAT4    | selected CDSs                   |
| FCGR1A  | selected CDSs                   |
| FCGR2B  | selected CDSs                   |
| FCRL4   | selected CDSs                   |
| FGF10   | selected CDSs                   |
| FGF14   | selected CDSs                   |
| FGF23   | selected CDSs                   |
| FGF3    | selected CDSs                   |
| FGF4    | selected CDSs                   |
| FGF6    | selected CDSs                   |
| FKBP5   | selected CDSs                   |
| FLG     | selected CDSs                   |
| FLI1    | selected CDSs                   |
| FLNC    | selected CDSs                   |
| FMN2    | selected CDSs                   |
| FMR1    | selected CDSs                   |
| FN1     | selected CDSs                   |
| FNDC4   | selected CDSs                   |
| FOXA2   | selected CDSs                   |
| FOXO3   | selected CDSs                   |
| FOXQ1   | selected CDSs                   |
| FRG1    | selected CDSs                   |

|           |               |
|-----------|---------------|
| FRMPD4    | selected CDSs |
| FUS       | selected CDSs |
| FXR1      | selected CDSs |
| FYN       | selected CDSs |
| FZD1      | selected CDSs |
| G3BP1     | selected CDSs |
| G3BP2     | selected CDSs |
| GABRA6    | selected CDSs |
| GATA2     | selected CDSs |
| GFRAL     | selected CDSs |
| GIGYF1    | selected CDSs |
| GKN2      | selected CDSs |
| GLB1L3    | selected CDSs |
| GLI1      | selected CDSs |
| GLI2      | selected CDSs |
| GLI3      | selected CDSs |
| GMPS      | selected CDSs |
| GNA12     | selected CDSs |
| GNA13     | selected CDSs |
| GNG2      | selected CDSs |
| GPC3      | selected CDSs |
| GPR124    | selected CDSs |
| GPX1      | selected CDSs |
| GRB7      | selected CDSs |
| GRM3      | selected CDSs |
| GSK3B     | selected CDSs |
| GSTM5     | selected CDSs |
| GSTP1     | selected CDSs |
| GUSB      | selected CDSs |
| H3F3A     | selected CDSs |
| H3F3C     | selected CDSs |
| HCLS1     | selected CDSs |
| HCN1      | selected CDSs |
| HDAC9     | selected CDSs |
| HECW1     | selected CDSs |
| HERC2     | selected CDSs |
| HEY1      | selected CDSs |
| HIP1      | selected CDSs |
| HIST1H1C  | selected CDSs |
| HIST1H1D  | selected CDSs |
| HIST1H1E  | selected CDSs |
| HIST1H2AC | selected CDSs |
| HIST1H2AG | selected CDSs |
| HIST1H2AL | selected CDSs |
| HIST1H2AM | selected CDSs |
| HIST1H2BC | selected CDSs |
| HIST1H2BD | selected CDSs |
| HIST1H2BJ | selected CDSs |
| HIST1H2BK | selected CDSs |
| HIST1H2BO | selected CDSs |
| HIST1H3B  | selected CDSs |
| HIST1H4I  | selected CDSs |
| HLF       | selected CDSs |
| HMCN1     | selected CDSs |

|          |                                 |
|----------|---------------------------------|
| HNRPDL   | selected CDSs                   |
| HOXA11   | selected CDSs                   |
| HOXA13   | selected CDSs                   |
| HOXA3    | selected CDSs                   |
| HOXA9    | selected CDSs                   |
| HOXC13   | selected CDSs                   |
| HOXD11   | selected CDSs                   |
| HOXD13   | selected CDSs                   |
| HSD3B1   | selected CDSs                   |
| HSD3B2   | selected CDSs                   |
| HSP90AB1 | selected CDSs                   |
| HSPA8    | selected CDSs                   |
| HSPD1    | selected CDSs                   |
| HSPH1    | selected CDSs                   |
| ICK      | selected CDSs                   |
| IFITM1   | selected CDSs                   |
| IFITM3   | selected CDSs                   |
| IGF2     | selected CDSs                   |
| IGF2R    | selected CDSs                   |
| IGLL5    | selected CDSs                   |
| IGSF10   | selected CDSs                   |
| IKBKE    | selected CDSs                   |
| IKZF1    | selected CDSs                   |
| IKZF2    | selected CDSs                   |
| IKZF3    | selected CDSs                   |
| IL1RAPL1 | selected CDSs                   |
| IL21R    | selected CDSs                   |
| IL6      | selected CDSs                   |
| IL6ST    | selected CDSs                   |
| IMPG1    | selected CDSs                   |
| ING1     | selected CDSs                   |
| INHBA    | selected CDSs                   |
| INPP4A   | selected CDSs                   |
| INPP5D   | selected CDSs                   |
| INPPL1   | selected CDSs                   |
| IRF4     | selected CDSs                   |
| IRF6     | selected CDSs                   |
| ITGB3    | selected CDSs                   |
| ITK      | selected CDSs                   |
| ITSN1    | selected CDSs                   |
| JARID2   | selected CDSs                   |
| KALRN    | selected CDSs                   |
| KAT6A    | selected CDSs                   |
| KAT6B    | selected CDSs                   |
| KCNJ5    | selected CDSs                   |
| KCNQ2    | selected CDSs                   |
| KDM2B    | selected CDSs                   |
| KDM3B    | selected CDSs                   |
| KEL      | selected CDSs                   |
| KIF5B    | selected CDSs,non-coding region |
| KLB      | selected CDSs                   |
| KLF4     | selected CDSs                   |
| KLHL6    | selected CDSs                   |
| KLK1     | selected CDSs                   |

|          |                                 |
|----------|---------------------------------|
| KRTAP5-5 | selected CDSs                   |
| L3MBTL1  | selected CDSs                   |
| LAMA2    | selected CDSs                   |
| LCP1     | selected CDSs                   |
| LEF1     | selected CDSs                   |
| LGALS8   | selected CDSs                   |
| LIFR     | selected CDSs                   |
| LPHN2    | selected CDSs                   |
| LPP      | selected CDSs                   |
| LRP2     | selected CDSs                   |
| LRP4     | selected CDSs                   |
| LRP5     | selected CDSs                   |
| LRP6     | selected CDSs                   |
| LRRC7    | selected CDSs                   |
| LRRK2    | selected CDSs                   |
| LYN      | selected CDSs                   |
| LZTS1    | selected CDSs                   |
| MACF1    | selected CDSs                   |
| MAD1L1   | selected CDSs                   |
| MAGI2    | selected CDSs                   |
| MAGOH    | selected CDSs                   |
| MAML2    | selected CDSs,non-coding region |
| MAML3    | selected CDSs                   |
| MAP3K13  | selected CDSs                   |
| MAPK3    | selected CDSs                   |
| MCC      | selected CDSs                   |
| MCM3     | selected CDSs                   |
| MDH2     | selected CDSs                   |
| MECOM    | selected CDSs                   |
| MEF2C    | selected CDSs                   |
| MGA      | selected CDSs                   |
| MIB1     | selected CDSs                   |
| MIOS     | selected CDSs                   |
| MKI67    | selected CDSs                   |
| MKL1     | selected CDSs                   |
| MLL4     | selected CDSs                   |
| MLLT3    | selected CDSs                   |
| MLLT6    | selected CDSs                   |
| MMP11    | selected CDSs                   |
| MMP2     | selected CDSs                   |
| MN1      | selected CDSs                   |
| MNDA     | selected CDSs                   |
| MNX1     | selected CDSs                   |
| MPO      | selected CDSs                   |
| MSH4     | selected CDSs                   |
| MSN      | selected CDSs                   |
| MSR1     | selected CDSs                   |
| MTHFR    | selected CDSs                   |
| MTRR     | selected CDSs                   |
| MUC5B    | selected CDSs                   |
| MYB      | selected CDSs                   |
| MYBL2    | selected CDSs                   |
| MYH10    | selected CDSs                   |
| MYH11    | selected CDSs                   |

|        |                                 |
|--------|---------------------------------|
| MYH14  | selected CDSs                   |
| MYH9   | selected CDSs                   |
| MYO3A  | selected CDSs                   |
| NAP1L1 | selected CDSs                   |
| NAV3   | selected CDSs                   |
| NBPF1  | selected CDSs                   |
| NCAM2  | selected CDSs                   |
| NCF2   | selected CDSs                   |
| NCF4   | selected CDSs                   |
| NCK1   | selected CDSs                   |
| NCOA2  | selected CDSs                   |
| NCOR2  | selected CDSs                   |
| NCSTN  | selected CDSs                   |
| NDRG1  | selected CDSs                   |
| NEB    | selected CDSs                   |
| NFATC4 | selected CDSs                   |
| NFE2L2 | selected CDSs                   |
| NFE2L3 | selected CDSs                   |
| NIN    | selected CDSs                   |
| NKX3-1 | selected CDSs                   |
| NLRC3  | selected CDSs                   |
| NOD1   | selected CDSs                   |
| NOS3   | selected CDSs                   |
| NQO1   | selected CDSs                   |
| NR1I2  | selected CDSs                   |
| NR2F2  | selected CDSs                   |
| NR4A2  | selected CDSs                   |
| NRP2   | selected CDSs                   |
| NRXN1  | selected CDSs                   |
| NTM    | selected CDSs                   |
| NTRK2  | selected CDSs,non-coding region |
| NUMA1  | selected CDSs                   |
| NUP107 | selected CDSs                   |
| NUP210 | selected CDSs                   |
| NUP98  | selected CDSs                   |
| OBSCN  | selected CDSs                   |
| OGDH   | selected CDSs                   |
| OMD    | selected CDSs                   |
| OPCML  | selected CDSs                   |
| OR11G2 | selected CDSs                   |
| OR2T4  | selected CDSs                   |
| OR4A15 | selected CDSs                   |
| OR4C6  | selected CDSs                   |
| OR5L2  | selected CDSs                   |
| OR6F1  | selected CDSs                   |
| P2RY8  | selected CDSs                   |
| P4HB   | selected CDSs                   |
| PABPC1 | selected CDSs                   |
| PABPC3 | selected CDSs                   |
| PAG1   | selected CDSs                   |
| PAK1   | selected CDSs                   |
| PAK3   | selected CDSs                   |
| PARK2  | selected CDSs                   |
| PARP1  | selected CDSs                   |



|           |               |
|-----------|---------------|
| PASK      | selected CDSs |
| PAX3      | selected CDSs |
| PAX7      | selected CDSs |
| PBX1      | selected CDSs |
| PC        | selected CDSs |
| PCDH18    | selected CDSs |
| PCLO      | selected CDSs |
| PCSK6     | selected CDSs |
| PCSK7     | selected CDSs |
| PDCD1     | selected CDSs |
| PDCD11    | selected CDSs |
| PDE4DIP   | selected CDSs |
| PDGFB     | selected CDSs |
| PDILT     | selected CDSs |
| PER1      | selected CDSs |
| PGR       | selected CDSs |
| PHF1      | selected CDSs |
| PIK3C2A   | selected CDSs |
| PIK3C2B   | selected CDSs |
| PIK3C2G   | selected CDSs |
| PIK3R3    | selected CDSs |
| PIP5K1A   | selected CDSs |
| PKD1L2    | selected CDSs |
| PKHD1     | selected CDSs |
| PLAC8     | selected CDSs |
| PLAG1     | selected CDSs |
| PLCB1     | selected CDSs |
| PLCG1     | selected CDSs |
| PLCG2     | selected CDSs |
| PLK1      | selected CDSs |
| PLXNA1    | selected CDSs |
| PLXNB2    | selected CDSs |
| POLQ      | selected CDSs |
| POLR2B    | selected CDSs |
| POM121    | selected CDSs |
| POM121L12 | selected CDSs |
| POTEG     | selected CDSs |
| POU2AF1   | selected CDSs |
| PPP1R17   | selected CDSs |
| PPP2R1A   | selected CDSs |
| PPP6C     | selected CDSs |
| PRAM1     | selected CDSs |
| PRDM1     | selected CDSs |
| PRDM16    | selected CDSs |
| PREX2     | selected CDSs |
| PRF1      | selected CDSs |
| PRKAA1    | selected CDSs |
| PRKCB     | selected CDSs |
| PRKCI     | selected CDSs |
| PRKDC     | selected CDSs |
| PRRX1     | selected CDSs |
| PRX       | selected CDSs |
| PSG2      | selected CDSs |
| PSIP1     | selected CDSs |

|         |                                 |
|---------|---------------------------------|
| PSMB1   | selected CDSs                   |
| PSMB5   | selected CDSs                   |
| PTGS1   | selected CDSs                   |
| PTGS2   | selected CDSs                   |
| PTK2    | selected CDSs                   |
| PTPN13  | selected CDSs                   |
| PTPN2   | selected CDSs                   |
| PTPRB   | selected CDSs                   |
| PTPRD   | selected CDSs                   |
| PTPRF   | selected CDSs                   |
| PTPRJ   | selected CDSs                   |
| PTPRK   | selected CDSs                   |
| PTPRO   | selected CDSs                   |
| PTPRT   | selected CDSs                   |
| PTPRU   | selected CDSs                   |
| RAB35   | selected CDSs                   |
| RAC1    | selected CDSs                   |
| RAC2    | selected CDSs                   |
| RAD21   | selected CDSs                   |
| RAD54B  | selected CDSs                   |
| RANBP2  | selected CDSs                   |
| RASA1   | selected CDSs                   |
| RASGRP1 | selected CDSs                   |
| RBL1    | selected CDSs                   |
| RECQL4  | selected CDSs                   |
| REL     | selected CDSs                   |
| RELN    | selected CDSs                   |
| RFC1    | selected CDSs                   |
| RGS3    | selected CDSs                   |
| RHOH    | selected CDSs                   |
| RHOT1   | selected CDSs                   |
| RIT1    | selected CDSs                   |
| RNF213  | selected CDSs                   |
| ROBO1   | selected CDSs                   |
| ROBO2   | selected CDSs                   |
| ROBO3   | selected CDSs                   |
| ROCK1   | selected CDSs                   |
| RPGR    | selected CDSs                   |
| RPL22   | selected CDSs                   |
| RPTOR   | selected CDSs                   |
| RSPO2   | selected CDSs,non-coding region |
| RSPO3   | selected CDSs                   |
| RUNX1T1 | selected CDSs                   |
| RUNX2   | selected CDSs                   |
| RXRA    | selected CDSs                   |
| RYR1    | selected CDSs                   |
| RYR2    | selected CDSs                   |
| SBDS    | selected CDSs                   |
| SCUBE2  | selected CDSs                   |
| SEC31A  | selected CDSs                   |
| SEMA3A  | selected CDSs                   |
| SEMA3E  | selected CDSs                   |
| SEMA6A  | selected CDSs                   |
| SERP2   | selected CDSs                   |

|          |               |
|----------|---------------|
| SERPINA7 | selected CDSs |
| SETBP1   | selected CDSs |
| SETDB1   | selected CDSs |
| SF1      | selected CDSs |
| SF3A1    | selected CDSs |
| SF3A3    | selected CDSs |
| SF3B1    | selected CDSs |
| SFPQ     | selected CDSs |
| SGCZ     | selected CDSs |
| SH3PXD2A | selected CDSs |
| SHH      | selected CDSs |
| SI       | selected CDSs |
| SIN3A    | selected CDSs |
| SLC16A1  | selected CDSs |
| SLC1A2   | selected CDSs |
| SLC22A16 | selected CDSs |
| SLC22A18 | selected CDSs |
| SLC22A2  | selected CDSs |
| SLC22A3  | selected CDSs |
| SLCO1B3  | selected CDSs |
| SLIT1    | selected CDSs |
| SLIT2    | selected CDSs |
| SMAD3    | selected CDSs |
| SMC1A    | selected CDSs |
| SMC1B    | selected CDSs |
| SMURF2   | selected CDSs |
| SNCAIP   | selected CDSs |
| SNTG1    | selected CDSs |
| SNX29    | selected CDSs |
| SOD2     | selected CDSs |
| SOS1     | selected CDSs |
| SOX10    | selected CDSs |
| SOX17    | selected CDSs |
| SPEN     | selected CDSs |
| SPOP     | selected CDSs |
| SPRR3    | selected CDSs |
| SPSB4    | selected CDSs |
| SPTA1    | selected CDSs |
| SRD5A2   | selected CDSs |
| SRGAP1   | selected CDSs |
| SRGAP3   | selected CDSs |
| SRSF2    | selected CDSs |
| SRSF7    | selected CDSs |
| SSX1     | selected CDSs |
| STAG1    | selected CDSs |
| STAT1    | selected CDSs |
| STAT5A   | selected CDSs |
| SUCLG1   | selected CDSs |
| SUCLG2   | selected CDSs |
| SULT1A1  | selected CDSs |
| SUZ12    | selected CDSs |
| SVEP1    | selected CDSs |
| SYNCRIP  | selected CDSs |
| SYNE1    | selected CDSs |

|          |                                 |
|----------|---------------------------------|
| TAF1     | selected CDSs                   |
| TAF15    | selected CDSs                   |
| TAF1L    | selected CDSs                   |
| TAL1     | selected CDSs                   |
| TBL1XR1  | selected CDSs                   |
| TBX15    | selected CDSs                   |
| TBX22    | selected CDSs                   |
| TCEB1    | selected CDSs                   |
| TCERG1   | selected CDSs                   |
| TCF12    | selected CDSs                   |
| TCF3     | selected CDSs                   |
| TCF4     | selected CDSs                   |
| TCL1A    | selected CDSs                   |
| TCP11    | selected CDSs                   |
| TEC      | selected CDSs                   |
| TENM3    | selected CDSs                   |
| TERT     | selected CDSs,non-coding region |
| TFDP1    | selected CDSs                   |
| TFDP2    | selected CDSs                   |
| TFE3     | selected CDSs,non-coding region |
| TGFBR1   | selected CDSs                   |
| TGFBR3   | selected CDSs                   |
| TGM2     | selected CDSs                   |
| THBS1    | selected CDSs                   |
| THBS2    | selected CDSs                   |
| THRAP3   | selected CDSs                   |
| TJP1     | selected CDSs                   |
| TLE1     | selected CDSs                   |
| TLL2     | selected CDSs                   |
| TLR4     | selected CDSs                   |
| TLX3     | selected CDSs                   |
| TMEM132D | selected CDSs                   |
| TNN      | selected CDSs                   |
| TNPO1    | selected CDSs                   |
| TOP2B    | selected CDSs                   |
| TP53BP1  | selected CDSs                   |
| TP63     | selected CDSs                   |
| TPM3     | selected CDSs,non-coding region |
| TPR      | selected CDSs                   |
| TRAF5    | selected CDSs                   |
| TRERF1   | selected CDSs                   |
| TRIM24   | selected CDSs                   |
| TRIM58   | selected CDSs                   |
| TRIO     | selected CDSs                   |
| TRPC5    | selected CDSs                   |
| TRRAP    | selected CDSs                   |
| TSHR     | selected CDSs                   |
| TSHZ2    | selected CDSs                   |
| TSHZ3    | selected CDSs                   |
| TTF1     | selected CDSs                   |
| TTL      | selected CDSs                   |
| TUBA3C   | selected CDSs                   |
| TUBB3    | selected CDSs                   |
| TUSC3    | selected CDSs                   |

|         |                   |
|---------|-------------------|
| TXNIP   | selected CDSs     |
| TYMS    | selected CDSs     |
| TYR     | selected CDSs     |
| TYRP1   | selected CDSs     |
| U2AF1   | selected CDSs     |
| UBE2D2  | selected CDSs     |
| UBR5    | selected CDSs     |
| UGT1A1  | selected CDSs     |
| UMPS    | selected CDSs     |
| UPF3B   | selected CDSs     |
| USH2A   | selected CDSs     |
| USP6    | selected CDSs     |
| USP8    | selected CDSs     |
| VDAC2   | selected CDSs     |
| VEZF1   | selected CDSs     |
| VIM     | selected CDSs     |
| WASF3   | selected CDSs     |
| WDR90   | selected CDSs     |
| WDTC1   | selected CDSs     |
| WHSC1   | selected CDSs     |
| WHSC1L1 | selected CDSs     |
| WIPF1   | selected CDSs     |
| WNK1    | selected CDSs     |
| WNT5A   | selected CDSs     |
| WSCD2   | selected CDSs     |
| WWOX    | selected CDSs     |
| WWP1    | selected CDSs     |
| WWP2    | selected CDSs     |
| XBP1    | selected CDSs     |
| XPC     | selected CDSs     |
| XRCC1   | selected CDSs     |
| YBX1    | selected CDSs     |
| YY1AP1  | selected CDSs     |
| ZBTB16  | selected CDSs     |
| ZC3H11A | selected CDSs     |
| ZFP36L1 | selected CDSs     |
| ZFP36L2 | selected CDSs     |
| ZFPM2   | selected CDSs     |
| ZIC3    | selected CDSs     |
| ZNF217  | selected CDSs     |
| ZNF384  | selected CDSs     |
| ZNF521  | selected CDSs     |
| ZNF638  | selected CDSs     |
| ZNF750  | selected CDSs     |
| ZNF804B | selected CDSs     |
| ZNF814  | selected CDSs     |
| CD74    | non-coding region |
| EML4    | non-coding region |
| NCOA4   | non-coding region |
| PPARG   | non-coding region |
| SLC34A2 | non-coding region |

**Supplementary Table S3. Quality control of the sequencing data.**

| PatientID | SampleID  | Total number of sequenced reads | Total number of uniquely mapped non-duplicate reads | Total number of covered targeted bases | Median coverage (and range) per targeted base | Percentage of targeted bases with coverage >200 |
|-----------|-----------|---------------------------------|-----------------------------------------------------|----------------------------------------|-----------------------------------------------|-------------------------------------------------|
| D002      | 170013896 | 35746909                        | 23302841                                            | 1838195356                             | 695 (365-1025)                                | 99.72%                                          |
| D006      | 180000617 | 58499809                        | 32873708                                            | 2620225932                             | 1519 (412-2626)                               | 99.82%                                          |
| C001      | 180007124 | 50850789                        | 31295064                                            | 2504140188                             | 1071 (242-1900)                               | 99.83%                                          |
| C002      | 180008812 | 21986476                        | 13446298                                            | 1103855236                             | 420 (163-677)                                 | 79.71%                                          |
| D022      | 180014924 | 58929738                        | 33866578                                            | 2753239764                             | 244 (144-344)                                 | 99.82%                                          |
| D024      | 180017526 | 51206675                        | 40355419                                            | 3201983740                             | 947 (321-1573)                                | 99.86%                                          |
| D028      | 180017634 | 76540217                        | 54350054                                            | 5641214300                             | 751 (439-1063)                                | 99.93%                                          |
| D029      | 180017640 | 46830560                        | 39231278                                            | 3116823460                             | 298 (181-415)                                 | 99.79%                                          |
| D030      | 180017648 | 30283780                        | 24752556                                            | 1953514716                             | 476 (231-1055)                                | 99.20%                                          |
| B003      | 180017686 | 77237829                        | 53127144                                            | 4224527716                             | 328 (188-468)                                 | 99.94%                                          |
| C008      | 180017707 | 47944630                        | 38163959                                            | 3021095760                             | 392 (148-636)                                 | 99.70%                                          |
| C009      | 180025989 | 68451775                        | 49123597                                            | 3893340920                             | 232 (81-383)                                  | 99.91%                                          |
| D058      | 180025996 | 40686957                        | 34118528                                            | 2709725888                             | 295 (108-482)                                 | 99.87%                                          |
| B006      | 180025998 | 42110838                        | 28940809                                            | 3021586600                             | 591 (345-1578)                                | 99.83%                                          |
| D061      | 180026012 | 38882030                        | 32342481                                            | 3327443600                             | 298 (187-409)                                 | 99.92%                                          |
| D062      | 180026017 | 52158908                        | 39781383                                            | 4111970200                             | 850 (542-1810)                                | 99.90%                                          |
| C010      | 180029928 | 29450740                        | 26799102                                            | 2486595780                             | 887 (3-1771)                                  | 99.86%                                          |
| D065      | 180029929 | 31202304                        | 28232251                                            | 2222787884                             | 293 (180-406)                                 | 99.83%                                          |
| D066      | 180029930 | 28320530                        | 25781558                                            | 2027358748                             | 296 (239-353)                                 | 99.75%                                          |
| D067      | 180029932 | 36097285                        | 28627238                                            | 2956644600                             | 1091 (896-1286)                               | 99.91%                                          |
| D068      | 180029933 | 42641486                        | 33404345                                            | 3437197400                             | 296 (254-338)                                 | 99.91%                                          |
| D074      | 180031348 | 38328617                        | 29459782                                            | 2319678384                             | 1367 (1086-1648)                              | 99.92%                                          |
| D075      | 180031349 | 46304280                        | 34921984                                            | 2745711584                             | 369 (333-405)                                 | 99.92%                                          |
| D076      | 180031350 | 50799516                        | 37976732                                            | 3055941988                             | 2047 (1506-2588)                              | 99.89%                                          |
| D080      | 180031367 | 45436065                        | 35503151                                            | 3667117200                             | 291 (241-341)                                 | 99.84%                                          |
| C013      | 180031368 | 37462480                        | 32079707                                            | 2542956504                             | 1186 (709-1663)                               | 99.83%                                          |
| D081      | 180031369 | 42441228                        | 36252055                                            | 2861819672                             | 267 (172-362)                                 | 99.87%                                          |
| C014      | 180031370 | 54025467                        | 44622086                                            | 3526796112                             | 1048 (1009-2117)                              | 99.91%                                          |
| D086      | 180031387 | 36659651                        | 32607460                                            | 2561071940                             | 241 (158-324)                                 | 99.92%                                          |
| B007      | 180031389 | 55342492                        | 42626627                                            | 3973339890                             | 299 (234-364)                                 | 99.92%                                          |
| D100      | 190000094 | 41297363                        | 36609129                                            | 3395663010                             | 261 (211-311)                                 | 99.96%                                          |
| C018      | 190000095 | 39532830                        | 35278323                                            | 3271738140                             | 1358 (997-1719)                               | 99.96%                                          |
| D101      | 190000100 | 32568896                        | 29335167                                            | 2330383820                             | 1217 (916-1518)                               | 99.68%                                          |
| D103      | 190000104 | 26676279                        | 21873799                                            | 1719668644                             | 1078 (853-1303)                               | 99.78%                                          |
| D113      | 190000153 | 33057896                        | 26411129                                            | 2078161936                             | 279 (235-323)                                 | 99.67%                                          |
| D114      | 190000154 | 40346639                        | 31681995                                            | 2489628444                             | 975 (417-1533)                                | 99.86%                                          |
| D115      | 190000155 | 32995225                        | 27133727                                            | 2144789084                             | 406 (319-493)                                 | 99.17%                                          |
| C024      | 190000276 | 51926278                        | 44231466                                            | 4617130500                             | 1303 (805-1801)                               | 99.88%                                          |
| C026      | 190000288 | 42108274                        | 33592197                                            | 2675634416                             | 371 (283-459)                                 | 99.88%                                          |
| D122      | 190001394 | 36156378                        | 27753740                                            | 2672480912                             | 2180 (1276-3084)                              | 99.92%                                          |
| C027      | 190001400 | 29425186                        | 20368454                                            | 1970065442                             | 728 (610-846)                                 | 99.88%                                          |
| D124      | 190001401 | 47682658                        | 36372710                                            | 3516676300                             | 395 (339-451)                                 | 99.92%                                          |
| D126      | 190001403 | 51569805                        | 31054232                                            | 3023677884                             | 871 (734-1008)                                | 99.92%                                          |
| D127      | 190001404 | 50017429                        | 36121031                                            | 3497117908                             | 714 (577-851)                                 | 99.92%                                          |
| D129      | 190001407 | 60579303                        | 49304601                                            | 4757358706                             | 283 (236-330)                                 | 99.93%                                          |

|      |           |          |          |            |                  |        |
|------|-----------|----------|----------|------------|------------------|--------|
| B010 | 190001474 | 35879643 | 19525843 | 1580560144 | 727 (590-864)    | 99.51% |
| C029 | 190001482 | 26627761 | 24786230 | 2397065706 | 418 (367-469)    | 99.76% |
| D136 | 190007536 | 37921385 | 34533475 | 3369680698 | 415 (352-478)    | 99.91% |
| DN5  | 190007537 | 39393111 | 34976570 | 3433476618 | 706 (370-1042)   | 99.92% |
| DN4  | 190007538 | 37854543 | 34082629 | 3308362336 | 1103 (664-1542)  | 99.91% |
| D137 | 190007592 | 24776310 | 20410743 | 2117229000 | 378 (313-443)    | 99.79% |
| D140 | 190007603 | 40053456 | 26896448 | 2793859100 | 514 (450-578)    | 99.84% |
| D146 | 190007722 | 25152886 | 21854887 | 2107836354 | 453 (372-534)    | 99.26% |
| D150 | 190011449 | 23327627 | 21802625 | 2097862390 | 1537 (807-2267)  | 99.36% |
| A003 | 190011451 | 33066342 | 30678836 | 2956226774 | 577 (507-647)    | 99.39% |
| D155 | 190011527 | 43962186 | 29709489 | 2886019114 | 406 (328-484)    | 99.94% |
| D156 | 190011528 | 45880585 | 26744639 | 2608261522 | 1520 (1139-1901) | 99.93% |
| D166 | 190011553 | 38439132 | 27850678 | 2903880100 | 1308 (987-1629)  | 99.70% |
| D171 | 190011564 | 28166294 | 25603781 | 2462096316 | 956 (737-1175)   | 99.38% |
| C037 | 190011582 | 31235307 | 25710429 | 2022554408 | 731 (209-1253)   | 99.28% |
| B015 | 190011593 | 25362261 | 20337523 | 1608000780 | 311 (251-371)    | 99.55% |
| D187 | 190011594 | 22748296 | 18342835 | 1448413396 | 1425 (986-1864)  | 99.23% |
| D188 | 190011595 | 23712515 | 19425693 | 1531684924 | 296 (224-368)    | 99.22% |
| D190 | 190011599 | 68572212 | 47160662 | 3755585524 | 283 (212-354)    | 99.88% |
| C041 | 190011600 | 48729486 | 41058983 | 3243989168 | 687 (571-803)    | 99.94% |
| D192 | 190011609 | 39276889 | 30618000 | 2386666228 | 348 (287-409)    | 99.44% |
| D193 | 190011612 | 26775613 | 21925592 | 1710995296 | 788 (627-949)    | 99.22% |
| D195 | 190014690 | 26512491 | 24353738 | 1904914236 | 1900 (1479-2321) | 99.12% |
| D196 | 190014691 | 27620070 | 25426260 | 1991447076 | 418 (366-470)    | 99.18% |
| B017 | 190014737 | 32146646 | 21551430 | 1692599952 | 764 (622-906)    | 99.12% |
| D199 | 190014771 | 49809464 | 39469184 | 3807220054 | 305 (258-352)    | 99.92% |
| D206 | 190014786 | 36740394 | 32857966 | 3182867166 | 310 (247-373)    | 99.40% |
| D210 | 190014790 | 8977371  | 8488189  | 819996498  | 710 (187-1496)   | 79.88% |
| B018 | 190014791 | 9582413  | 9158292  | 880104046  | 661 (284-2756)   | 89.69% |
| C043 | 190014809 | 35992509 | 30619172 | 2411682084 | 963 (749-1177)   | 99.37% |
| D219 | 190014811 | 54787957 | 48966638 | 3817432424 | 387 (313-461)    | 99.41% |
| D221 | 190018152 | 36009077 | 30423175 | 2954530356 | 1458 (1082-1834) | 99.81% |
| C046 | 190018153 | 53501604 | 42006467 | 4085443040 | 1767 (1224-2310) | 99.82% |
| D223 | 190018182 | 29458904 | 27269383 | 2620768692 | 372 (303-441)    | 99.38% |
| D225 | 190018194 | 27942595 | 26133646 | 2518694468 | 337 (247-427)    | 99.38% |
| D231 | 190018210 | 31372485 | 27911454 | 2690120388 | 1026 (641-1411)  | 99.42% |
| D234 | 190018214 | 37105723 | 34168952 | 3286151828 | 1447 (848-2046)  | 99.42% |
| D235 | 190018215 | 31736569 | 29636853 | 2850588446 | 504 (433-575)    | 99.42% |
| D237 | 190018222 | 29076438 | 26388269 | 2062817460 | 1121 (766-1476)  | 99.19% |
| D238 | 190018223 | 19783876 | 17976891 | 1411992220 | 309 (259-359)    | 96.75% |
| C055 | 190021892 | 34125647 | 30029507 | 2896937120 | 248 (202-294)    | 99.93% |
| D249 | 190021894 | 49453036 | 38873362 | 3780584120 | 835 (714-956)    | 99.94% |
| D253 | 190021905 | 55555723 | 44736192 | 4382564444 | 941 (794-1088)   | 99.39% |
| D254 | 190021906 | 51677818 | 42963813 | 4168288812 | 1183 (613-1753)  | 99.41% |
| C056 | 190022015 | 64340082 | 48137336 | 3801206272 | 1363 (1111-1615) | 99.89% |
| D258 | 190022017 | 81580133 | 55254605 | 5431198740 | 345 (288-402)    | 99.94% |
| D263 | 190026171 | 44455326 | 34684817 | 3340960220 | 1261 (1031-1491) | 99.92% |
| C058 | 190026174 | 48693260 | 31496683 | 3196241392 | 1586 (1095-2077) | 99.96% |
| D269 | 190026189 | 37141782 | 26755665 | 2582634866 | 1247 (945-1549)  | 99.90% |
| D276 | 190031271 | 82846762 | 63371459 | 6177040894 | 352 (279-425)    | 99.97% |
| D284 | 190033551 | 66416024 | 48931776 | 4731037202 | 481 (409-553)    | 99.93% |

|      |           |          |          |            |                  |        |
|------|-----------|----------|----------|------------|------------------|--------|
| D285 | 190033552 | 52283927 | 36117839 | 3484467482 | 1079 (662-1496)  | 99.92% |
| B023 | 190033558 | 38568371 | 32028829 | 3085785282 | 931 (861-1001)   | 99.88% |
| D287 | 190033560 | 61795286 | 50954092 | 4894669958 | 813 (753-873)    | 99.93% |
| D289 | 190033627 | 46750553 | 37559018 | 3618259280 | 713 (664-762)    | 99.92% |
| C059 | 190033658 | 52441158 | 40982281 | 3963473340 | 1144 (874-1414)  | 99.71% |
| D300 | 190033659 | 56213867 | 46064185 | 4453797926 | 1345 (1000-1690) | 99.69% |
| C061 | 190033675 | 56072978 | 40596180 | 3917136698 | 368 (296-440)    | 99.14% |
| C062 | 190033686 | 73058420 | 56358930 | 5418289626 | 1151 (535-1767)  | 99.94% |
| C063 | 190033687 | 51057739 | 42798787 | 4109350812 | 254 (205-303)    | 99.91% |
| D306 | 190033688 | 68712482 | 52507277 | 5041482824 | 1285 (711-1859)  | 99.96% |
| C064 | 190033691 | 48207282 | 40455651 | 3899809114 | 1031 (833-1229)  | 99.94% |
| C065 | 190033692 | 52360290 | 44536015 | 4291417062 | 315 (267-363)    | 99.94% |
| C066 | 190033694 | 56536708 | 48833209 | 4733109714 | 913 (756-1070)   | 99.91% |
| C067 | 190033699 | 39561507 | 35404506 | 3432421092 | 391 (301-481)    | 99.89% |
| D007 | 180007108 | 16056559 | 11605216 | 921645312  | 956 (696-1216)   | 75.79% |
| D012 | 180012989 | 17718904 | 10730779 | 847419304  | 831 (626-1036)   | 71.63% |
| C003 | 180013178 | 15078534 | 10756507 | 850872516  | 428 (357-499)    | 73.95% |
| D013 | 180013179 | 14644404 | 10376368 | 820091984  | 1501 (1218-1784) | 66.17% |
| D014 | 180014769 | 13754639 | 11269645 | 885851592  | 479 (400-558)    | 78.97% |
| C004 | 180014787 | 12436231 | 10376317 | 815501052  | 1366 (967-1765)  | 78.93% |
| C005 | 180014800 | 10989867 | 8049655  | 631774472  | 558 (463-653)    | 62.06% |
| D025 | 180017530 | 17010770 | 14249138 | 1485441400 | 351 (293-409)    | 77.98% |
| C006 | 180017639 | 15875922 | 13531279 | 1066821880 | 378 (319-437)    | 96.59% |
| C007 | 180017649 | 11768502 | 9789443  | 771885184  | 386 (304-468)    | 76.85% |
| D031 | 180017662 | 17351631 | 14989813 | 1183894712 | 1333 (987-1679)  | 96.28% |
| D033 | 180017670 | 12671745 | 10805529 | 1110205200 | 885 (768-1002)   | 95.45% |
| D037 | 180017689 | 14361269 | 11846460 | 1219128000 | 1003 (862-1144)  | 92.28% |
| D038 | 180017696 | 15201467 | 12802805 | 1316731000 | 423 (378-468)    | 97.20% |
| D042 | 180017711 | 10272483 | 8150478  | 839052500  | 405 (338-472)    | 79.67% |
| D043 | 180017712 | 12984463 | 10162734 | 799676028  | 1246 (826-1666)  | 75.52% |
| D045 | 180022557 | 15170181 | 12306842 | 1312415500 | 328 (308-348)    | 89.76% |
| B004 | 180022560 | 17128705 | 14723508 | 1165152352 | 831 (783-879)    | 96.40% |
| D047 | 180022562 | 12456718 | 10510952 | 826973480  | 818 (769-867)    | 79.40% |
| D051 | 180025976 | 12274538 | 10033582 | 1034638700 | 387 (364-410)    | 93.17% |
| B005 | 180025980 | 12734967 | 10460787 | 1077110300 | 950 (857-1043)   | 95.47% |
| D052 | 180025981 | 11779617 | 9694931  | 999848200  | 1439 (968-1910)  | 92.16% |
| D053 | 180025983 | 15684405 | 12124680 | 955235412  | 449 (424-474)    | 86.21% |
| D057 | 180025995 | 11054838 | 9069285  | 716370528  | 916 (858-974)    | 69.53% |
| D060 | 180026011 | 10526588 | 8864665  | 911690800  | 1791 (1174-2408) | 88.58% |
| D063 | 180026018 | 11644187 | 9455439  | 973458100  | 487 (447-527)    | 90.52% |
| D064 | 180029885 | 19528010 | 16525104 | 1301903864 | 1335 (1139-1531) | 98.94% |
| D071 | 180029936 | 11002451 | 9026676  | 927734100  | 403 (368-438)    | 96.12% |
| D077 | 180031359 | 18434411 | 15368450 | 1211734196 | 379 (349-409)    | 96.77% |
| D082 | 180031376 | 17502150 | 14605146 | 1151270876 | 354 (322-386)    | 94.64% |
| D084 | 180031384 | 16016236 | 14673682 | 1154521016 | 1083 (770-1396)  | 97.04% |
| D087 | 180031390 | 17158857 | 15327195 | 1201108864 | 245 (233-257)    | 98.60% |
| D088 | 180031391 | 15097810 | 13653275 | 1318416646 | 590 (551-629)    | 99.46% |
| C016 | 180031392 | 16221544 | 14573039 | 1142421816 | 423 (370-476)    | 96.35% |
| D089 | 180031393 | 15174821 | 13697521 | 1073090512 | 821 (273-1369)   | 94.62% |
| A001 | 180031396 | 14289134 | 12798382 | 1002460444 | 1048 (960-1136)  | 92.47% |
| D090 | 190000001 | 12124562 | 11044984 | 1055887712 | 484 (430-538)    | 97.84% |



|      |           |          |          |            |                  |        |
|------|-----------|----------|----------|------------|------------------|--------|
| D092 | 190000029 | 17154287 | 15013063 | 1167728524 | 488 (431-545)    | 96.24% |
| C017 | 190000030 | 15491422 | 13785791 | 1320121430 | 1321 (975-1667)  | 97.88% |
| D093 | 190000031 | 15584443 | 13797043 | 1320556086 | 306 (287-325)    | 98.94% |
| D097 | 190000076 | 13372356 | 12466534 | 1151944650 | 1248 (1155-1341) | 98.14% |
| C019 | 190000099 | 11688802 | 10563720 | 828677628  | 1175 (1077-1273) | 81.70% |
| C020 | 190000101 | 13809223 | 12629652 | 994218928  | 409 (389-429)    | 93.69% |
| D102 | 190000102 | 12127131 | 10348093 | 814388792  | 1200 (1070-1330) | 77.84% |
| C021 | 190000103 | 12737471 | 10867091 | 855798912  | 399 (363-435)    | 76.63% |
| B008 | 190000105 | 8071413  | 6914063  | 542284700  | 1149 (1033-1265) | 48.72% |
| D104 | 190000107 | 12878031 | 10719737 | 840483316  | 291 (268-314)    | 91.57% |
| D107 | 190000114 | 15938968 | 13045713 | 1024790916 | 734 (678-790)    | 95.44% |
| D108 | 190000115 | 11088646 | 8978976  | 923948900  | 337 (316-358)    | 91.27% |
| D109 | 190000142 | 13246102 | 10847443 | 1117007200 | 925 (835-1015)   | 94.27% |
| D110 | 190000144 | 12926047 | 10881315 | 850603096  | 273 (234-312)    | 88.96% |
| D111 | 190000148 | 19774700 | 14976933 | 1177009340 | 726 (608-844)    | 99.19% |
| D116 | 190000166 | 14742384 | 12264602 | 962086508  | 266 (227-305)    | 94.68% |
| C022 | 190000170 | 13500503 | 12384669 | 1148406300 | 761 (633-889)    | 97.04% |
| D119 | 190000277 | 12469199 | 10345205 | 1064911800 | 198 (170-226)    | 87.75% |
| C025 | 190000278 | 12315693 | 10197734 | 1050971700 | 1235 (984-1486)  | 89.27% |
| B009 | 190000287 | 12759775 | 10863042 | 852930824  | 325 (269-381)    | 73.41% |
| D125 | 190001402 | 9693461  | 8718386  | 837483130  | 1082 (865-1299)  | 92.94% |
| D130 | 190001467 | 14606958 | 11822019 | 930610728  | 676 (206-1146)   | 91.19% |
| D133 | 190001479 | 17912531 | 16305138 | 1573977078 | 388 (313-463)    | 99.66% |
| D134 | 190001480 | 13447831 | 12273922 | 1185487016 | 730 (497-963)    | 97.12% |
| D138 | 190007596 | 10753250 | 8987096  | 924502700  | 335 (263-407)    | 96.41% |
| D139 | 190007599 | 12940902 | 10244822 | 1051607400 | 1751 (1285-2217) | 97.67% |
| B011 | 190007602 | 11990029 | 10060763 | 1036686300 | 1257 (886-1628)  | 98.12% |
| D142 | 190007609 | 12137609 | 9940325  | 779107084  | 387 (311-463)    | 86.76% |
| D143 | 190007715 | 16068413 | 14271555 | 1366705856 | 336 (281-391)    | 98.86% |
| D144 | 190007718 | 13165949 | 11720026 | 911547648  | 707 (389-1025)   | 92.07% |
| D145 | 190007721 | 6223531  | 5546035  | 531656668  | 473 (336-610)    | 44.03% |
| D147 | 190007723 | 9373995  | 5378007  | 421944476  | 216 (3-429)      | 23.64% |
| D148 | 190007725 | 16063243 | 14204824 | 1363744668 | 812 (628-996)    | 99.16% |
| B012 | 190011450 | 11819028 | 10859350 | 1040277602 | 284 (229-339)    | 97.39% |
| D151 | 190011515 | 8504989  | 7748071  | 743638324  | 975 (730-1220)   | 83.89% |
| D152 | 190011518 | 11047460 | 10113531 | 973356464  | 670 (541-799)    | 92.45% |
| D153 | 190011519 | 11978508 | 10867026 | 1047492290 | 368 (303-433)    | 93.40% |
| D157 | 190011529 | 10718417 | 9484787  | 911741438  | 954 (461-1447)   | 93.31% |
| D160 | 190011536 | 15169250 | 13304667 | 1280659854 | 1075 (990-1160)  | 98.82% |
| D161 | 190011537 | 12701792 | 11339549 | 1090483754 | 416 (389-443)    | 98.57% |
| D162 | 190011544 | 15303284 | 13786238 | 1327819184 | 956 (352-1560)   | 98.45% |
| D163 | 190011545 | 5009414  | 4722589  | 454116914  | 410 (382-438)    | 21.71% |
| D164 | 190011546 | 13357056 | 12058787 | 1161123908 | 1007 (532-2135)  | 98.12% |
| C030 | 190011547 | 12895001 | 10782319 | 1100769500 | 400 (312-488)    | 98.07% |
| D165 | 190011551 | 13186518 | 11842516 | 1139350688 | 1062 (897-1227)  | 98.69% |
| C031 | 190011560 | 11691093 | 10810543 | 1038777080 | 1670 (1263-2077) | 95.83% |
| D170 | 190011562 | 12853145 | 11323214 | 1086429722 | 338 (276-400)    | 96.73% |
| D172 | 190011565 | 13789477 | 12339549 | 1183482560 | 343 (280-406)    | 97.64% |
| D174 | 190011568 | 12401695 | 11450359 | 1099676954 | 1947 (1312-2582) | 96.96% |
| C032 | 190011569 | 12748036 | 11716863 | 1124558002 | 485 (405-565)    | 98.38% |
| D175 | 190011570 | 12548287 | 11606312 | 1113239932 | 275 (234-316)    | 95.36% |

|      |           |          |          |            |                  |        |
|------|-----------|----------|----------|------------|------------------|--------|
| D176 | 190011571 | 12222361 | 10488125 | 1006550214 | 896 (701-1091)   | 95.68% |
| C033 | 190011572 | 11102173 | 9995561  | 958760990  | 1159 (807-1511)  | 94.04% |
| D177 | 190011575 | 14343410 | 12781668 | 1226793718 | 1194 (711-1677)  | 97.98% |
| C035 | 190011576 | 12476555 | 11250753 | 1078681208 | 296 (272-320)    | 98.10% |
| D178 | 190011577 | 14624353 | 13015859 | 1009044476 | 450 (379-521)    | 95.90% |
| C036 | 190011578 | 14113849 | 12536931 | 971549876  | 357 (322-392)    | 94.03% |
| D179 | 190011579 | 13130295 | 11727686 | 908485608  | 838 (449-1227)   | 92.59% |
| D180 | 190011580 | 13457548 | 12415779 | 1190515452 | 281 (257-305)    | 97.74% |
| D181 | 190011583 | 15794760 | 13285300 | 1041742868 | 1411 (964-1858)  | 94.10% |
| C038 | 190011586 | 19831133 | 16528925 | 1297442816 | 939 (477-1401)   | 98.35% |
| D184 | 190011587 | 9380977  | 7852666  | 799868800  | 1121 (277-1965)  | 88.77% |
| D185 | 190011588 | 17286130 | 13948080 | 1081657232 | 1350 (796-1904)  | 98.03% |
| D186 | 190011592 | 16721274 | 13656393 | 1087890144 | 1272 (1076-1468) | 69.50% |
| C039 | 190011597 | 13212741 | 11912053 | 934664112  | 130 (124-136)    | 90.70% |
| C040 | 190011598 | 13571557 | 12161921 | 954770596  | 355 (301-409)    | 90.60% |
| DT6  | 190011606 | 17600024 | 14588173 | 1139662028 | 1892 (1463-2321) | 97.24% |
| C042 | 190011610 | 18912616 | 12843940 | 1003194832 | 1736 (1135-2337) | 92.24% |
| B016 | 190011611 | 10769545 | 8985300  | 700058344  | 270 (216-324)    | 70.80% |
| D194 | 190014689 | 11555282 | 10681041 | 829724984  | 873 (562-1184)   | 86.11% |
| D197 | 190014767 | 15801423 | 12708127 | 1222027824 | 335 (267-403)    | 98.87% |
| D198 | 190014770 | 8847055  | 8186721  | 785131052  | 1076 (820-1332)  | 88.84% |
| D200 | 190014774 | 12031295 | 10926964 | 1047569276 | 232 (195-269)    | 98.45% |
| D201 | 190014778 | 11191552 | 10024384 | 780143648  | 829 (670-988)    | 79.57% |
| D203 | 190014780 | 13214143 | 12025219 | 1151921966 | 676 (77-1275)    | 97.57% |
| D204 | 190014781 | 14731580 | 13234468 | 1266340552 | 1065 (992-1138)  | 98.99% |
| D209 | 190014789 | 15032890 | 13219884 | 1029690408 | 961 (912-1010)   | 93.30% |
| D214 | 190014803 | 16558216 | 14584314 | 1148202376 | 424 (393-455)    | 91.28% |
| D218 | 190014808 | 17923108 | 14883737 | 1160578596 | 965 (919-1011)   | 98.59% |
| C044 | 190014810 | 17628565 | 14651943 | 1143614256 | 466 (431-501)    | 97.34% |
| A004 | 190014812 | 29252652 | 25936283 | 2020072932 | 319 (295-343)    | 99.34% |
| C045 | 190014813 | 30385793 | 26869892 | 2094846900 | 797 (757-837)    | 99.24% |
| D220 | 190018149 | 12669935 | 11600225 | 907645580  | 1191 (1112-1270) | 84.49% |
| B019 | 190018150 | 10877831 | 9568885  | 922269156  | 1158 (1053-1263) | 90.53% |
| D222 | 190018175 | 11151241 | 10353120 | 811177108  | 1176 (1074-1278) | 64.41% |
| B020 | 190018188 | 14464940 | 13219694 | 1266417350 | 380 (314-446)    | 98.93% |
| C047 | 190018190 | 11847167 | 10793441 | 1031669646 | 769 (627-911)    | 97.34% |
| C048 | 190018192 | 13135835 | 11887592 | 1137898576 | 1230 (839-1621)  | 98.52% |
| C049 | 190018196 | 10606686 | 9833288  | 945288910  | 372 (308-436)    | 90.40% |
| D226 | 190018197 | 14606938 | 13023376 | 1012212536 | 421 (319-523)    | 96.53% |
| D227 | 190018199 | 12454581 | 11401388 | 1092342792 | 1795 (1465-2125) | 98.05% |
| D229 | 190018208 | 11924784 | 10866514 | 1041648122 | 413 (345-481)    | 96.12% |
| C050 | 190018212 | 12550908 | 11259002 | 1078144938 | 1221 (625-1817)  | 97.13% |
| D236 | 190018221 | 15761410 | 14003092 | 1089130996 | 938 (549-2149)   | 95.52% |
| C051 | 190021858 | 9202888  | 8354459  | 800473356  | 324 (249-399)    | 90.56% |
| D239 | 190021859 | 9464119  | 8644634  | 828451046  | 572 (409-1710)   | 91.48% |
| D241 | 190021866 | 8749749  | 8121454  | 777513104  | 650 (472-1527)   | 87.44% |
| D242 | 190021867 | 11512957 | 10527334 | 1008408406 | 1075 (631-1519)  | 96.96% |
| D243 | 190021868 | 12064710 | 10793055 | 1035558708 | 308 (249-367)    | 98.90% |
| D245 | 190021870 | 9097095  | 8393625  | 804422766  | 910 (830-990)    | 88.70% |
| D246 | 190021871 | 9798864  | 9084379  | 868683140  | 780 (718-842)    | 93.91% |
| D247 | 190021874 | 10562014 | 9604408  | 922111800  | 339 (303-375)    | 89.82% |

|      |           |          |          |            |                  |        |
|------|-----------|----------|----------|------------|------------------|--------|
| C053 | 190021882 | 9213287  | 8528103  | 819359930  | 828 (734-922)    | 92.55% |
| C054 | 190021886 | 13227851 | 11968120 | 1153503798 | 191 (170-212)    | 97.92% |
| D251 | 190021901 | 10634454 | 9793134  | 940563812  | 765 (658-872)    | 91.96% |
| D256 | 190022008 | 6178588  | 5807524  | 558020754  | 518 (459-577)    | 49.84% |
| D257 | 190022010 | 12195293 | 11075856 | 1068038152 | 1014 (937-1091)  | 95.50% |
| D259 | 190026113 | 25242249 | 21997937 | 2142584112 | 767 (729-805)    | 98.80% |
| C057 | 190026167 | 14480651 | 12873680 | 1234479722 | 318 (301-335)    | 99.57% |
| D265 | 190026173 | 14792031 | 12962046 | 1009639404 | 974 (905-1043)   | 97.24% |
| D267 | 190026186 | 13953354 | 12304162 | 1182148982 | 1005 (945-1065)  | 99.51% |
| D268 | 190026188 | 10947275 | 10168392 | 975643296  | 280 (258-302)    | 95.77% |
| D271 | 190029506 | 12176862 | 10604996 | 1019027022 | 2600 (1409-5355) | 98.34% |
| D272 | 190029509 | 14350719 | 12377290 | 1189065972 | 1539 (876-2202)  | 99.22% |
| B022 | 190029520 | 9025789  | 8179547  | 785489474  | 1567 (1067-2067) | 90.41% |
| D274 | 190029522 | 7577026  | 6923673  | 664503766  | 361 (331-391)    | 78.53% |
| D275 | 190029523 | 8788024  | 8006338  | 767542524  | 406 (360-452)    | 89.87% |
| D278 | 190033513 | 13182020 | 11243527 | 1080020802 | 982 (229-1735)   | 98.86% |
| D279 | 190033514 | 7759997  | 7059466  | 676964500  | 298 (267-329)    | 78.00% |
| D280 | 190033532 | 15327228 | 12895176 | 1238490326 | 1128 (549-1707)  | 97.56% |
| D281 | 190033543 | 16249020 | 13470189 | 1293572822 | 1041 (226-1856)  | 97.13% |
| D282 | 190033545 | 9756800  | 8666451  | 831050240  | 351 (313-389)    | 90.91% |
| CDD5 | 190033546 | 9534449  | 8504105  | 814883838  | 776 (354-1198)   | 87.52% |
| D283 | 190033548 | 10795835 | 9587344  | 919261438  | 1971 (1271-2671) | 93.29% |
| D286 | 190033553 | 7249899  | 6526772  | 625178208  | 1618 (813-2423)  | 68.55% |
| D288 | 190033626 | 13022265 | 11225528 | 1082301430 | 490 (431-549)    | 95.69% |
| D294 | 190033642 | 14808588 | 12912074 | 1239223714 | 470 (427-513)    | 99.06% |
| D297 | 190033651 | 9407502  | 8249593  | 794388454  | 1516 (1126-1906) | 79.28% |
| D298 | 190033653 | 6582769  | 5977255  | 574517660  | 163 (157-169)    | 47.79% |
| D299 | 190033657 | 10112638 | 8653691  | 828941914  | 411 (375-447)    | 80.17% |
| D301 | 190033660 | 9874956  | 8436891  | 809122578  | 1424 (1014-1834) | 76.54% |
| D303 | 190033667 | 14250940 | 12424653 | 1195812164 | 414 (339-489)    | 94.62% |
| C060 | 190033674 | 21624938 | 16060189 | 1541201816 | 1833 (1200-2466) | 95.34% |
| D307 | 190033689 | 10901813 | 9943661  | 953456570  | 441 (400-482)    | 95.37% |
| D308 | 190033690 | 11661606 | 10622164 | 1018974382 | 1532 (978-2086)  | 97.42% |
| D309 | 190033693 | 12932158 | 11715106 | 1123403494 | 323 (264-382)    | 98.76% |
| D311 | 190033697 | 13617691 | 12280874 | 1178783312 | 370 (347-393)    | 99.10% |
| D312 | 190033698 | 10742595 | 9745740  | 933946870  | 1171 (907-1435)  | 93.49% |
| D313 | 190033700 | 11076905 | 10019884 | 960716472  | 307 (289-325)    | 94.82% |
| A002 | 190007607 | 13014944 | 10346797 | 811056572  | 1090 (855-1325)  | 89.81% |
| C012 | 180031364 | 13848930 | 11708518 | 1208478600 | 372 (325-419)    | 97.88% |
| B014 | 190011561 | 41402717 | 34479830 | 3330329196 | 1229 (452-2006)  | 99.93% |
| C028 | 190001408 | 12332670 | 10067741 | 791487864  | 907 (831-983)    | 72.49% |
| C034 | 190011573 | 56551865 | 7910714  | 806593978  | 444 (399-489)    | 71.08% |
| C052 | 190021864 | 12055265 | 10839451 | 1038716732 | 853 (771-935)    | 97.81% |
| D027 | 180017633 | 17639594 | 14854853 | 1553975100 | 950 (890-1010)   | 41.53% |
| D048 | 180025971 | 9977950  | 8125181  | 838446900  | 427 (388-466)    | 84.03% |
| D072 | 180029937 | 10523200 | 8638586  | 677103988  | 916 (852-980)    | 71.92% |
| D123 | 190001399 | 13491170 | 11541772 | 1106538672 | 389 (364-414)    | 99.27% |
| D128 | 190001406 | 11396684 | 9730841  | 936274216  | 1430 (622-2238)  | 92.42% |
| D154 | 190011526 | 13844210 | 12252073 | 1177481882 | 406 (377-435)    | 98.43% |
| D173 | 190011566 | 14456889 | 13300987 | 1277329340 | 995 (923-1067)   | 98.63% |
| D213 | 190014801 | 22287872 | 19638754 | 1547631396 | 388 (364-412)    | 98.11% |

|      |           |          |          |            |                  |        |
|------|-----------|----------|----------|------------|------------------|--------|
| D228 | 190018202 | 10747466 | 9843518  | 943548218  | 781 (689-873)    | 94.42% |
| D240 | 190021865 | 37450288 | 28726646 | 2789090168 | 336 (303-369)    | 99.87% |
| D260 | 190026131 | 14898277 | 12778656 | 997038604  | 367 (156-932)    | 94.61% |
| D262 | 190026170 | 13760909 | 11485294 | 1169958500 | 716 (652-2132)   | 99.43% |
| D264 | 190026172 | 16977582 | 14983351 | 1166482580 | 234 (187-2209)   | 99.03% |
| D290 | 190033628 | 16786992 | 14823612 | 1422251678 | 1337 (1186-1488) | 99.30% |
| B025 | 199007437 | 46234707 | 37091317 | 3825825100 | 408 (370-446)    | 99.99% |
| B031 | 199007455 | 56910321 | 33258240 | 3240711758 | 1000 (783-2043)  | 99.98% |
| B034 | 199007500 | 82846762 | 63371459 | 6177040894 | 881 (812-950)    | 99.97% |
| C074 | 199007480 | 47852540 | 40633815 | 3907094114 | 385 (343-427)    | 99.97% |
| A005 | 199007434 | 82499395 | 67022532 | 5299632152 | 1003 (904-1102)  | 99.96% |
| B027 | 199007447 | 66926958 | 45539883 | 4714994400 | 363 (323-403)    | 99.96% |
| B028 | 199007449 | 63341808 | 52482167 | 4154302120 | 1276 (800-1752)  | 99.96% |
| B029 | 199007451 | 54383100 | 46604680 | 3656474608 | 344 (308-380)    | 99.96% |
| B030 | 199007453 | 41297363 | 36609129 | 3395663010 | 939 (894-984)    | 99.96% |
| C068 | 199007461 | 39532830 | 35278323 | 3271738140 | 414 (386-442)    | 99.96% |
| C069 | 199007463 | 48693260 | 31496683 | 3196241392 | 635 (515-755)    | 99.96% |
| C072 | 199007472 | 46684073 | 37797830 | 3653114856 | 610 (504-716)    | 99.96% |
| C073 | 199007474 | 66669373 | 51556157 | 4985060358 | 339 (284-394)    | 99.96% |
| C075 | 199007482 | 68572445 | 52667912 | 5069568614 | 321 (237-405)    | 99.96% |
| C080 | 199007492 | 46210978 | 36789620 | 3543324924 | 439 (363-515)    | 99.96% |
| C081 | 199007494 | 68712482 | 52507277 | 5041482824 | 841 (581-1101)   | 99.96% |
| C082 | 199007495 | 62686666 | 50467210 | 4859728654 | 423 (351-495)    | 99.96% |
| C083 | 199007498 | 86361705 | 50268337 | 3996281172 | 308 (252-364)    | 99.95% |
| C079 | 199007490 | 42755070 | 30862945 | 2976289194 | 1139 (423-1855)  | 99.95% |
| C076 | 199007484 | 50124222 | 39109566 | 3808646598 | 436 (338-534)    | 99.95% |
| B026 | 199007445 | 56883785 | 45710912 | 4399103744 | 1158 (902-1414)  | 99.95% |
| B032 | 199007457 | 67370601 | 50349807 | 4903215498 | 573 (468-678)    | 99.95% |
| B033 | 199007459 | 77852678 | 54732174 | 5328145318 | 247 (201-293)    | 99.95% |
| C070 | 199007466 | 70734471 | 55383533 | 5335852002 | 579 (453-705)    | 99.95% |
| C077 | 199007486 | 87229761 | 68877555 | 5429475720 | 528 (418-638)    | 99.94% |
| B036 | 199007503 | 77237829 | 53127144 | 4224527716 | 574 (464-684)    | 99.94% |
| C071 | 199007470 | 57387409 | 43652270 | 4523277900 | 323 (296-350)    | 99.94% |
| B035 | 199007502 | 62659446 | 47401599 | 4646485612 | 649 (601-697)    | 99.94% |

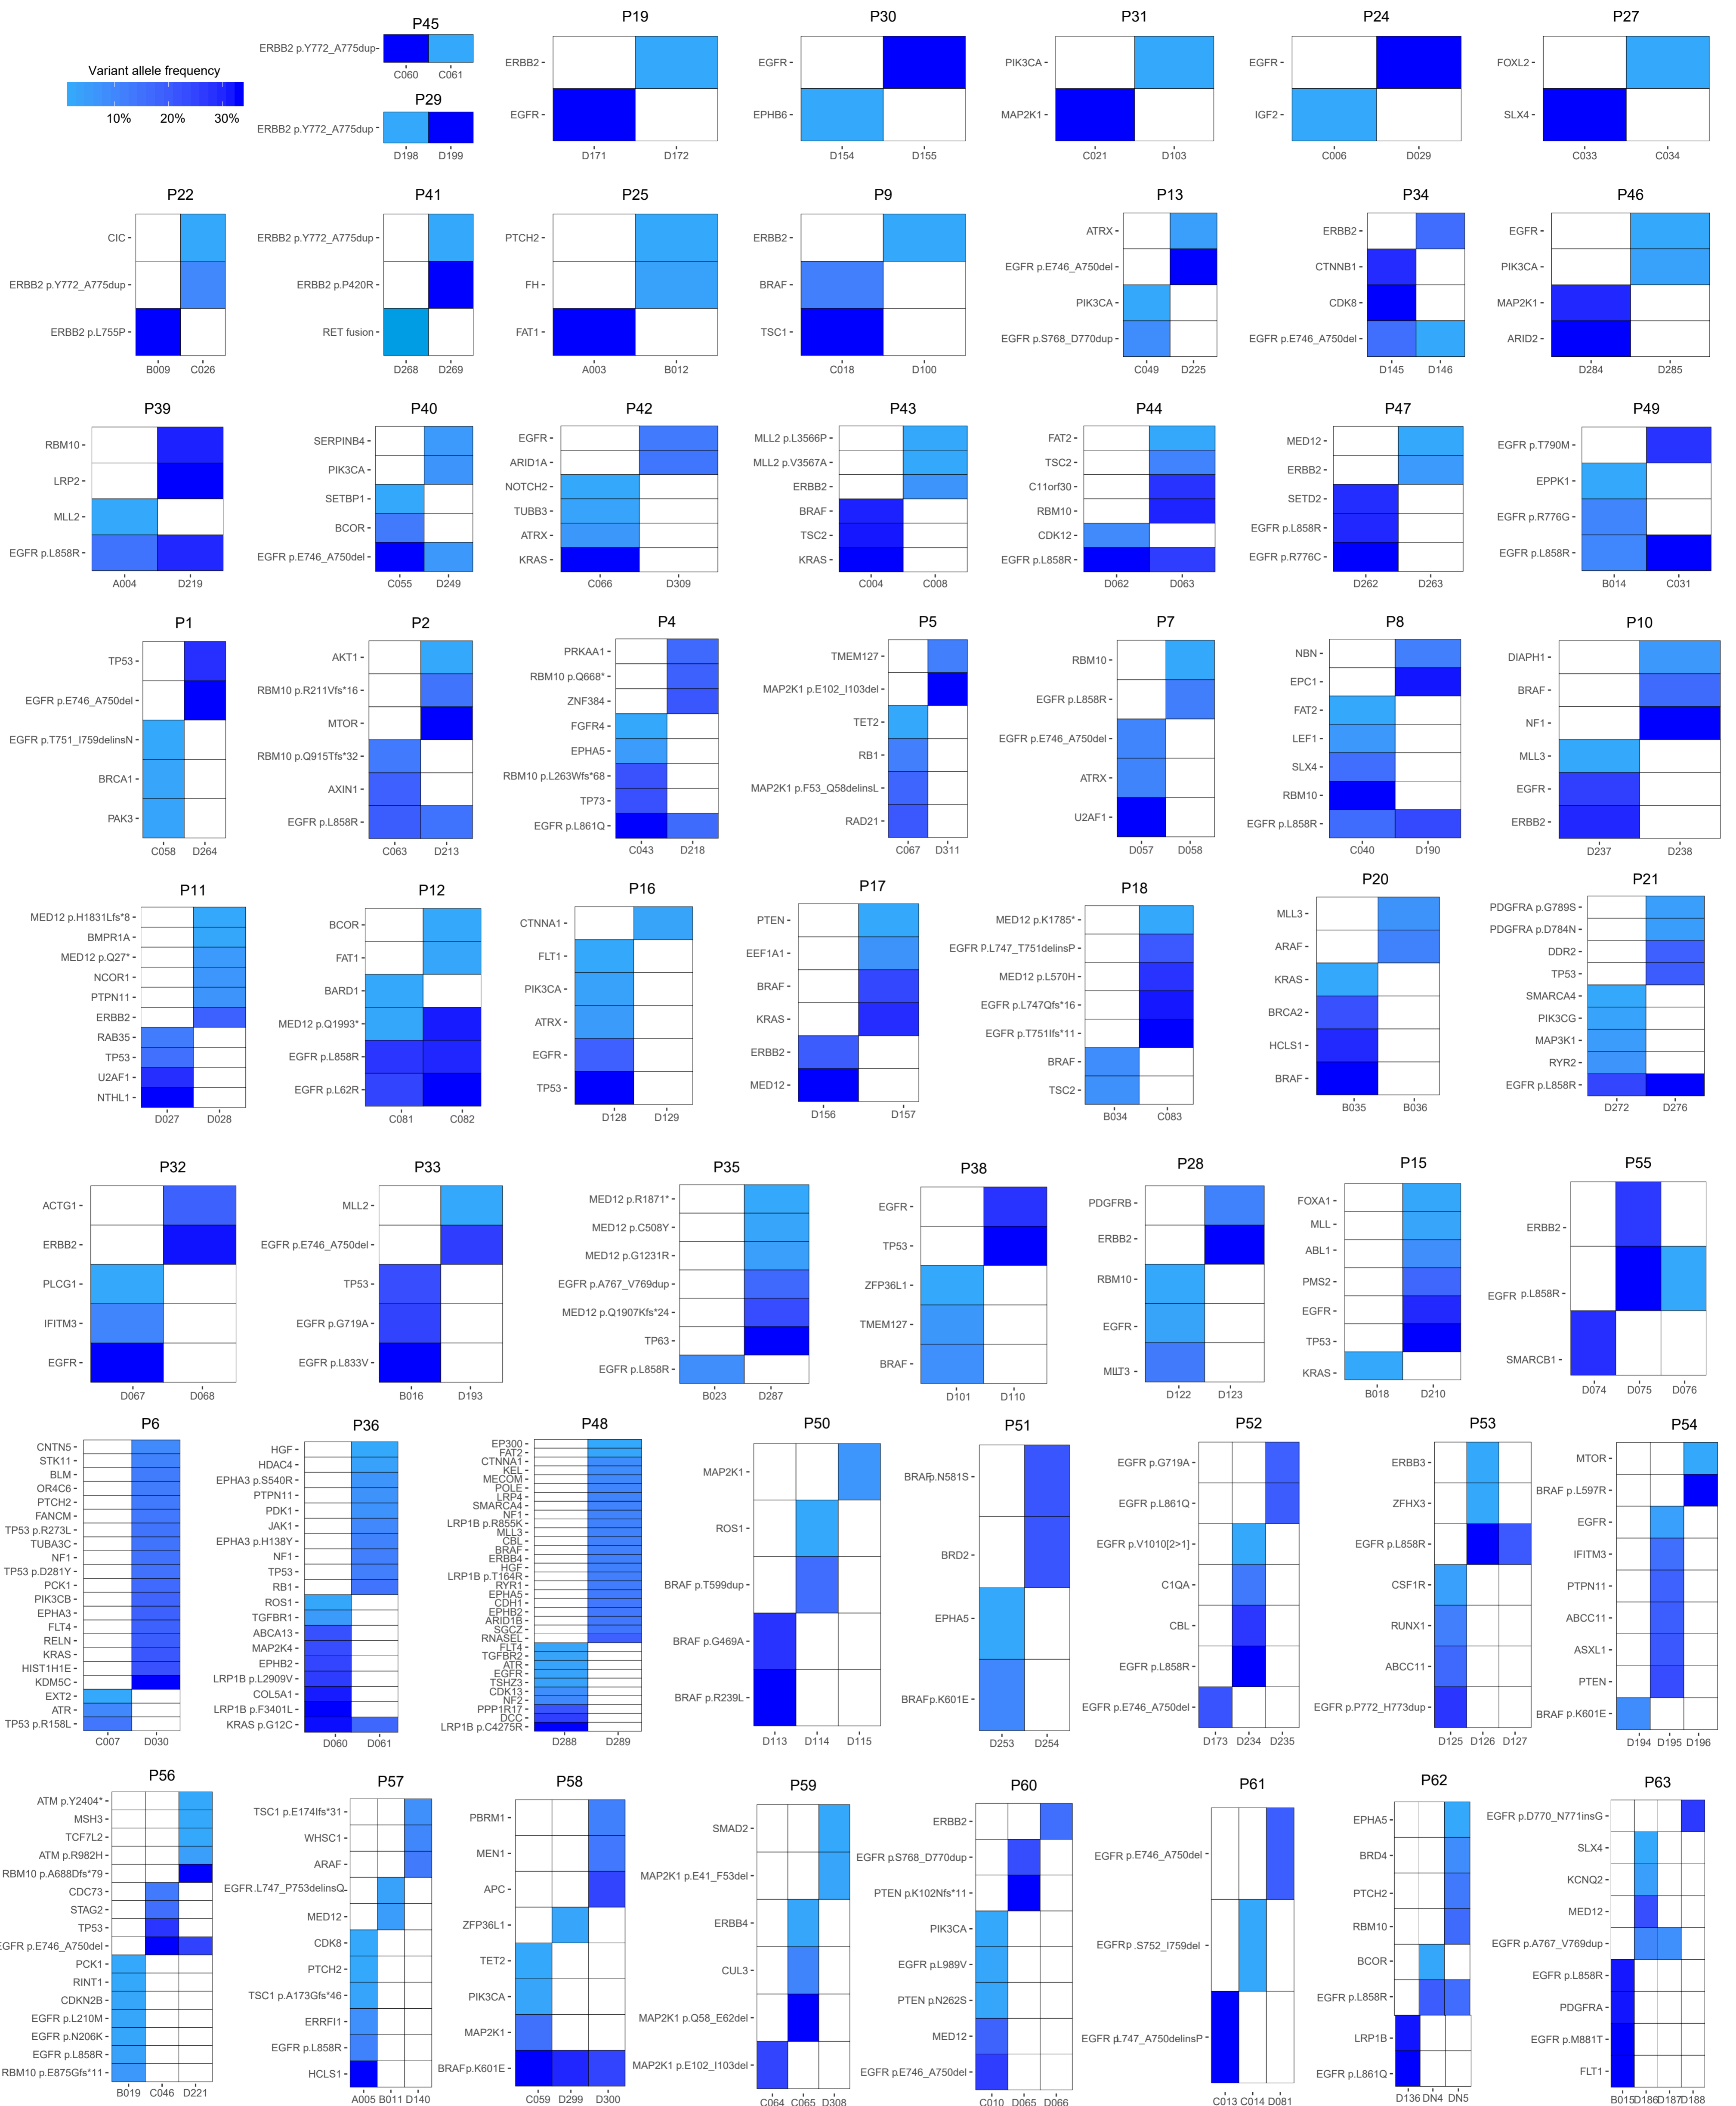

Supplementary Figure S1. Internodal heterogeneity comparison in the same patients presenting as GGO. Each patient with multiple GGO nodules is depicted as a small heatmap, where each row indicates a mutation, and each column indicates a nodule. The shade of color is corresponding to the variant allele frequency.

EGFR

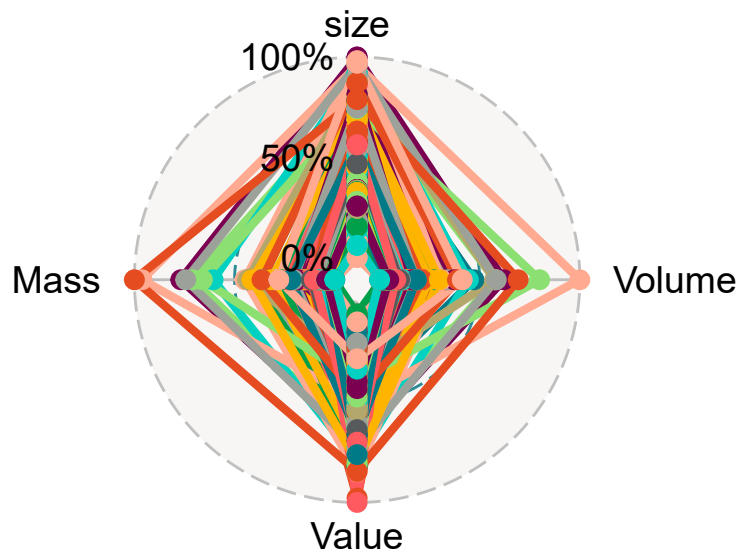

KRAS

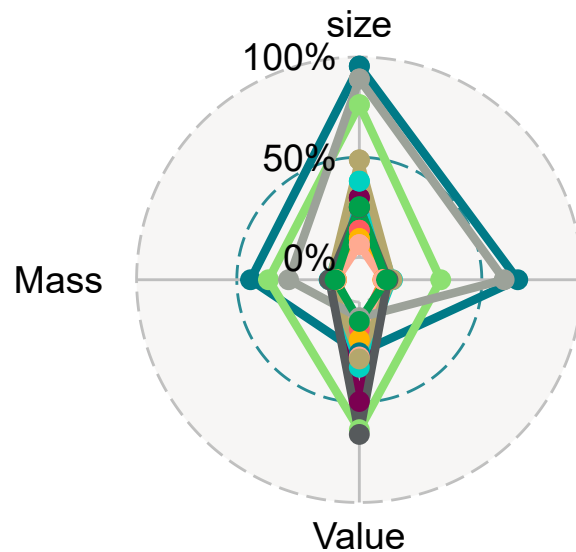

ERBB2

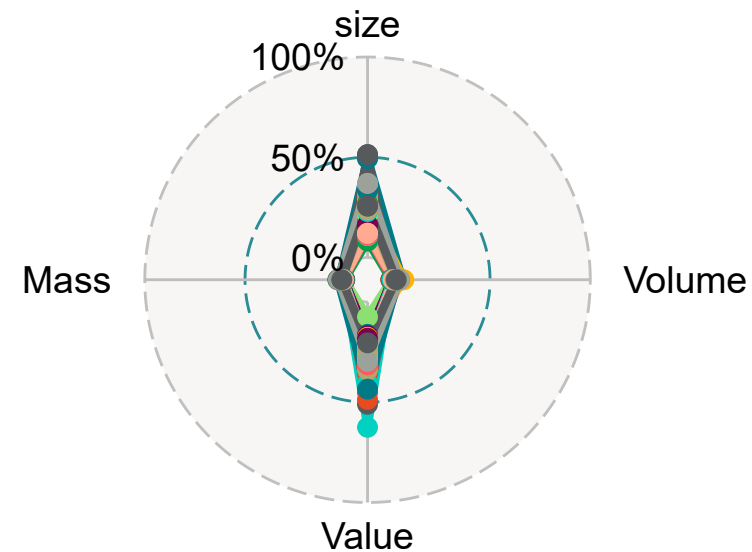

BRAF

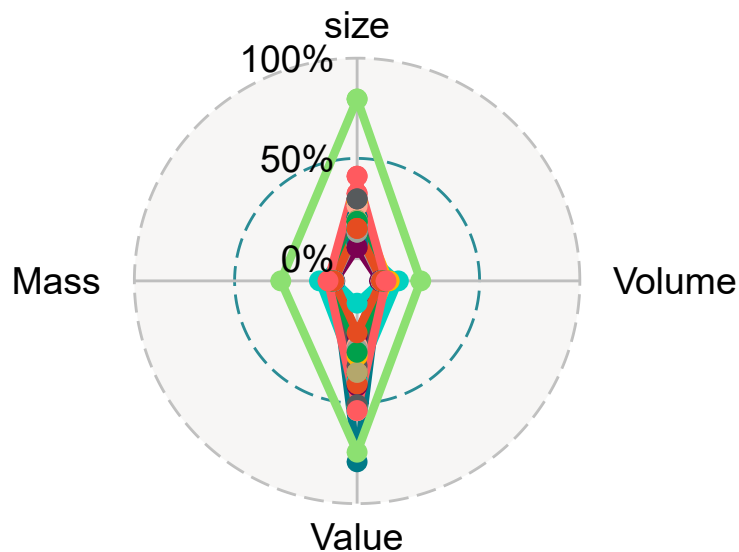

MAP2K1

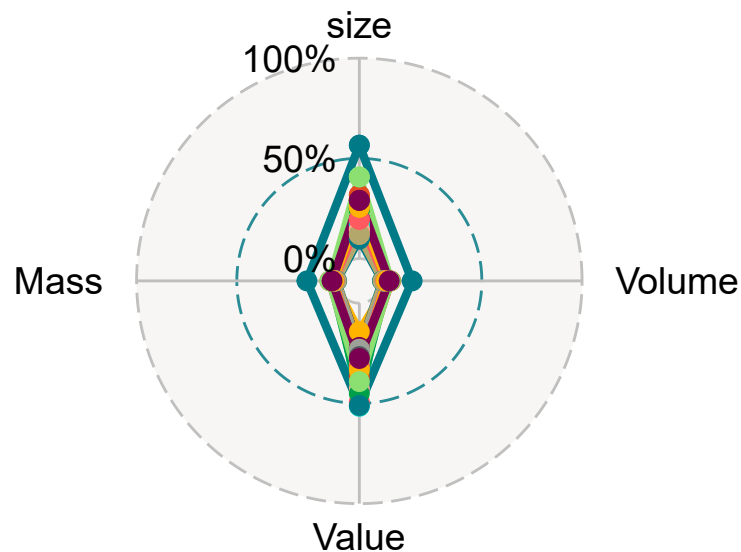

Supplementary Figure S2. Radar plots showing the standard radiologic features including CT size, CT mass, CT volume and CT value in each group of GGO nodules defined by different driver genes.

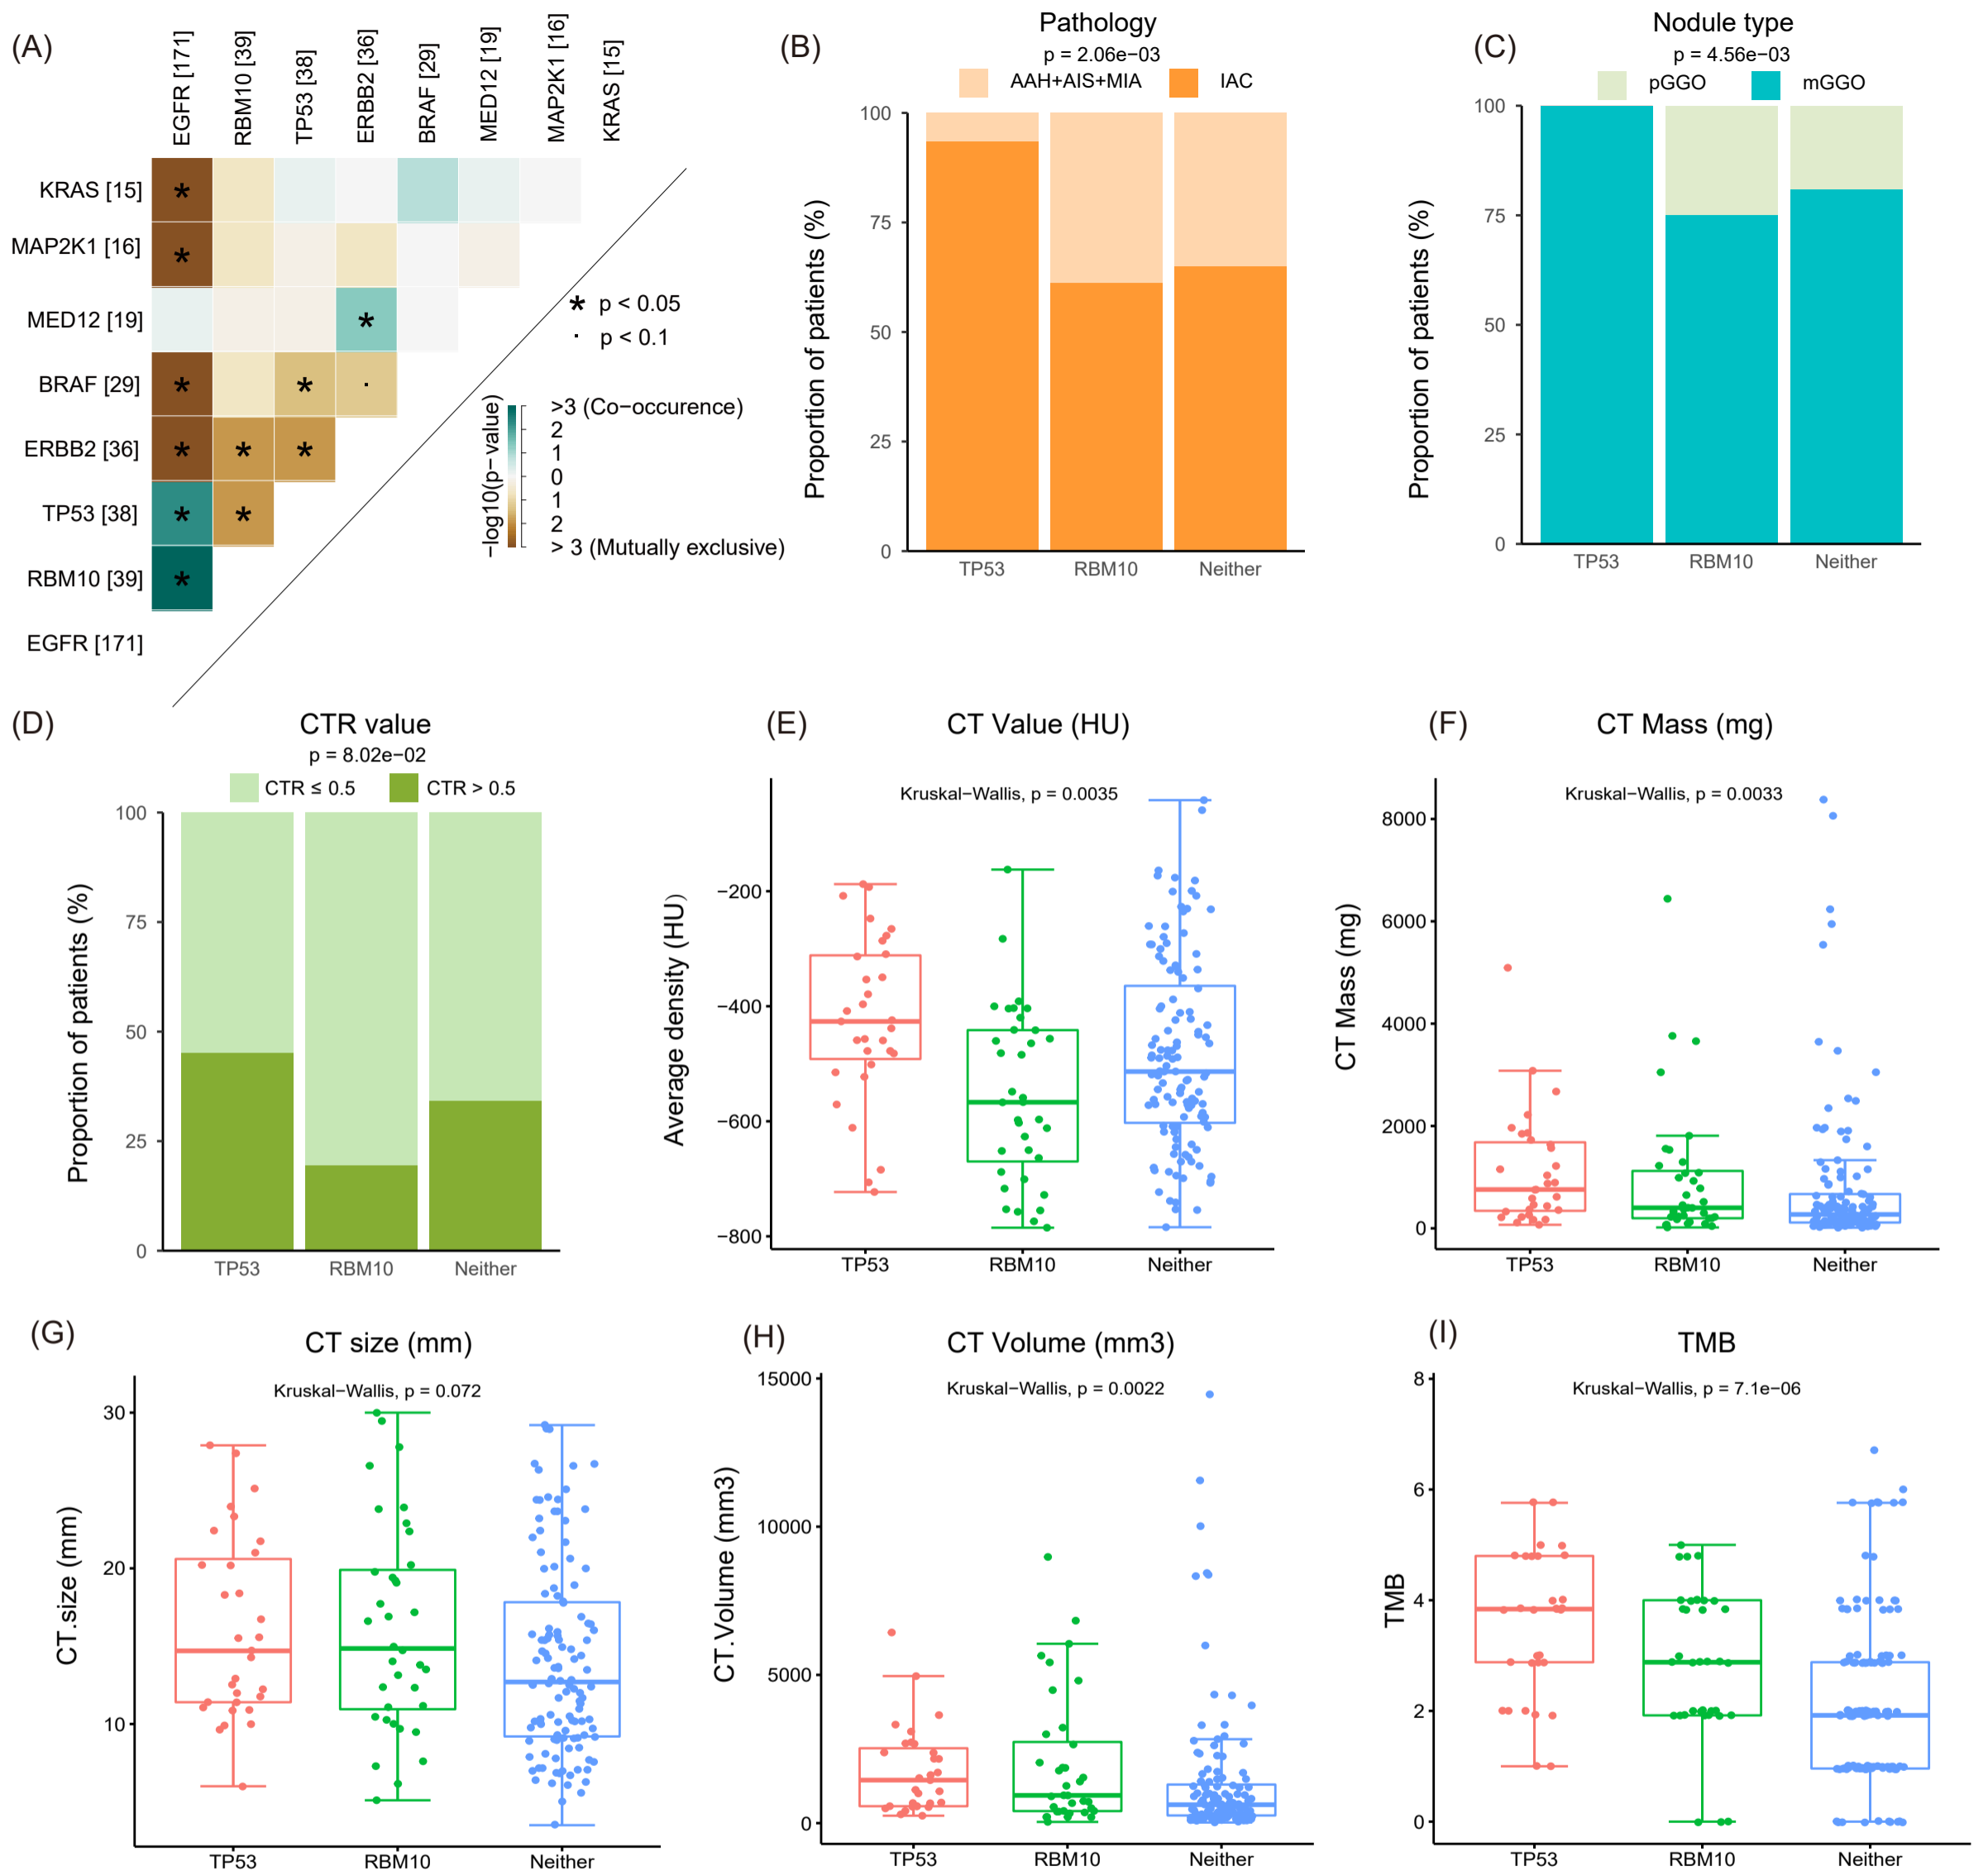

Supplementary Figure S3. The association of co-mutation with clinicopathologic and radiologic features in GGO nodules (A) Co-occurrence of the top 8 mutated genes in the cohort. Only genes with mutations in at least 15 samples were considered. (B-I) Comparisons of pathology (B), nodule type (C), CTR value (D), CT value (E), CT mass (F), CT size (G), CT volume (H) and TMB (I) among different gene co-mutation groups. The global differences among the groups were assessed by Fisher's exact test or by Kruskal-Wallis test as appropriate.
